# Supplementary material for: Zinc triflate-mediated cyclopropanation of oxindoles with vinyl diphenyl sulfonium triflate: a mild reaction with broad functional group compatibility
Source: Royal Society of Chemistry journal article supplement (doi:10.1039/c6ra24985j), 2017-01-01

## Supporting Information

### **Zinc Triflate-Mediated Cyclopropanation of Oxindoles with Vinyl Diphenyl Sulfonium Triflate: a Mild Reaction with Broad Functional Group Compatibility**

**Mingweizhou,<sup>a,b</sup> Ke En,<sup>a</sup> Yimin Hu,<sup>\*b</sup> Yufang Xu,<sup>a</sup> Hong C. Shen<sup>b</sup> and Xuhong Qian<sup>\*a</sup>**

<sup>a</sup> Shanghai Key Laboratory of Chemical Biology, East China University of Science and Technology, Shanghai 200237, China;

<sup>b</sup> Roche Pharmaceutical Research and Early Development, Roche Innovation Center Shanghai, Shanghai 201203, China;

Email: xhqian@ecust.edu.cn

### **Table of Content**

|                                                           |           |
|-----------------------------------------------------------|-----------|
| <b>1. General information</b>                             | <b>2</b>  |
| <b>2. Preparation of vinyl diphenylsulfonium triflate</b> | <b>2</b>  |
| <b>3. General procedure</b>                               | <b>2</b>  |
| <b>4. Charaterization of product</b>                      | <b>3</b>  |
| <b>5. NMR spectra of product</b>                          | <b>16</b> |

## 1. General information

NMR spectra were obtained on a Bruker AV II-400 MHz spectrometer ( $^1\text{H}$  NMR at 400 MHz,  $^{13}\text{C}$  NMR at 100 MHz). The  $^1\text{H}$  NMR chemical shifts were measured relative to  $\text{CDCl}_3$ , MeOD or  $\text{DMSO-d}_6$  as the internal reference ( $\text{CDCl}_3$ :  $\delta = 7.26$  ppm; MeOD:  $\delta = 3.31$  ppm;  $\text{DMSO-d}_6$ :  $\delta = 2.50$  ppm). The  $^{13}\text{C}$  NMR chemical shifts were given using MeOD or  $\text{DMSO-d}_6$  as the internal standard ( $\text{CDCl}_3$ :  $\delta = 77.16$  ppm; MeOD:  $\delta = 49.00$  ppm;  $\text{DMSO-d}_6$ :  $\delta = 39.52$  ppm). Mass spectroscopy data were collected on an HRMS-ESI instrument. Reagents, solvents and starting materials were obtained from commercial sources and used without further purification unless otherwise noted. Anhydrous  $\text{Zn}(\text{OTf})_2$  and starting materials 1a-1o was purchased from Aldrich, Acros, Sinopharma.

## 2. Preparation of vinyl diphenylsulfonium triflate

Vinyl diphenylsulfonium were synthesized from the 2-bromoethanol and phenylsulfanylbenzene according to the reported procedure. (Reference: Muhammad Yar; Matthew G. Unthank; Eoghan M. McGarrigle; Varinder K. Aggarwal *Chem. Asian J.* **2011**, 6, 372 – 375)

## 3. General Procedure for oxindole's cyclopropanation

### General Procedure A: for the N-Nonsubstituted oxindole substrate's Cyclopropanation

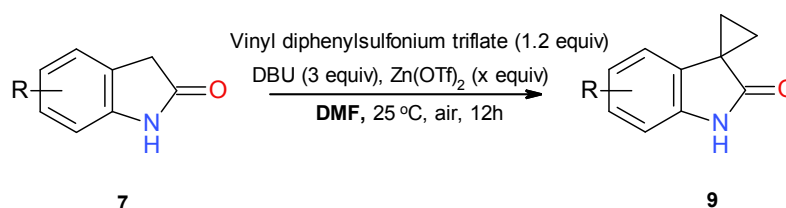

To a 25 mL Schlenk tube were added amide **7** (0.2 mmol, 1.0 equiv), vinyl diphenylsulfonium triflate (0.24 mmol, 1.2 equiv),  $\text{Zn}(\text{OTf})_2$  (0.2 mmol, 1.0 equiv) DMF (1 mL). The mixture was stirred at room temperature for 2 min and DBU (91.2 mg, 0.6 mmol, 3.0 equiv) was added into it. The mixture was stirred for 4 hours at

room temperature till the reaction completed, and quenched with saturated ammonium chloride solution (5 mL), then was extracted with EtOAc (3 x 50 mL). The combined organic layer washed with H<sub>2</sub>O (2 x 10 mL), dried with anhydrous sodium sulfate. After concentration, product 9 was purified using column chromatography on silica gel using appropriate eluent.

### General Procedure B: for the N-substituted oxindole substrate's Cyclopropanation

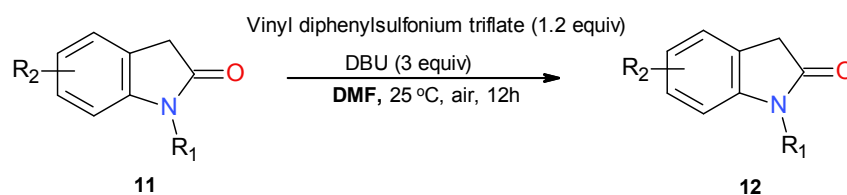

To a 25 mL Schlenk tube were added amide **11** (0.2 mmol, 1.0 equiv), vinyl diphenylsulfonium triflate (86.9 mg, 0.24 mmol, 1.2 equiv), DMF (1 mL). The mixture was stirred at room temperature for 2 min and DBU (91.2 mg, 0.6 mmol, 3.0 equiv) was added into it. The mixture was stirred for 4 hours at room temperature till the reaction completed, quenched with saturated ammonium chloride solution (5 mL), and was extracted with EtOAc (3 x 50 mL). The combined organic layer washed with H<sub>2</sub>O (2 x 10 mL), dried with anhydrous sodium sulfate. After concentration, product was purified using column chromatography on silica gel using appropriate eluent.

## 4. Characterization of product

### spiro[cyclopropane-1,3'-indoline]-2'-one (9a)

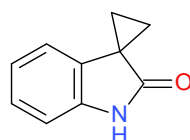

The title compound **9a** was prepared according to general procedure A. A purification by flash chromatography (petroleum ether: ethyl acetate = 20: 1 to 3:1) gave **9a** as a white solid in 91% yield, mp 181-183 °C.

<sup>1</sup>H NMR (400 MHz, CDCl<sub>3</sub>): δ 8.74 (br s, 1H), 7.06-7.19 (m, 1H), 6.88-6.95(m, 2H), 6.75 (d, *J*=7.34 Hz, 1H), 1.63-1.74 (m, 2H), 1.40-1.54 (m, 2H)

<sup>13</sup>C NMR (100 MHz, CDCl<sub>3</sub>): δ 179.6, 140.6, 131.2, 126.8, 122.1, 118.6, 110.0, 27.6, 19.6

HRMS (ESI-TOF) calcd for C<sub>10</sub>H<sub>9</sub>NO [M + H]<sup>+</sup>: 160.07569 found: 160.07610.

**5'-fluorospiro[cyclopropane-1,3'-indoline]-2'-one (9b)**

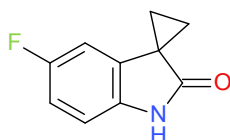

The title compound **9b** was prepared according to general procedure A. A purification by flash chromatography (petroleum ether: ethyl acetate = 20: 1 to 3:1) gave **9b** as a white solid in 89% yield, mp 207-210 °C.

<sup>1</sup>H NMR (400 MHz, METHANOL-d<sub>4</sub>) δ 6.92-6.94 (m, 2H), 6.77 (d, *J*=8.46 Hz, 1H), 1.59-1.70 (m, 4H)

<sup>13</sup>C NMR (400 MHz, METHANOL-d<sub>4</sub>) δ 179.8, 160.3-158.0 (d, *J*<sub>C-F</sub> = 238Hz) , 137.2, 133.3-133.2 (d, *J*<sub>C-F</sub> = 9.6Hz), 112.6-112.4 (d, *J*<sub>C-F</sub> = 24Hz), 110.1-110.0 (d, *J*<sub>C-F</sub> = 8.2Hz), 106.6-106.3 (d, *J*<sub>C-F</sub> = 26Hz), 27.6, 19.0

HRMS (ESI-TOF) calcd for C<sub>10</sub>H<sub>8</sub>NFO [M + H]<sup>+</sup>: 178.06627 found: 178.06639

**2'-oxospiro[cyclopropane-1,3'-indoline]-5'-carbonitrile (9c)**

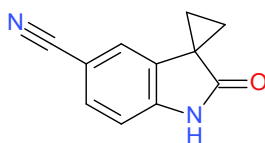

The title compound **9c** was prepared according to general procedure A. A purification by flash chromatography (petroleum ether: ethyl acetate = 20: 1 to 3:1) gave **9c** as a white solid in 93% yield, mp 303-306 °C.

<sup>1</sup>H NMR (400 MHz, DMSO-d<sub>6</sub>) δ 11.04 (br s, 1H), 7.62 (dd, *J*=1.59, 8.07 Hz, 1H), 7.49(s, 1H), 7.04 (d, *J*=8.07 Hz, 1H), 1.62-1.81 (m, 2H), 1.45-1.62 (m, 2H)

<sup>13</sup>C NMR (101 MHz, DMSO-d<sub>6</sub>) δ 178.1, 146.4, 132.7, 132.3, 123.5, 120.1, 110.4, 103.5, 27.4, 19.7

HRMS (ESI-TOF) calcd for C<sub>11</sub>H<sub>8</sub>N<sub>2</sub>O [M + H]<sup>+</sup>: 185.07094 found: 185.07126

**methyl 2'-oxospiro[cyclopropane-1,3'-indoline]-5'-carboxylate (9d)**

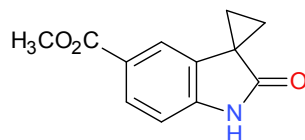

The title compound **9d** was prepared according to general procedure A. A purification by flash chromatography (petroleum ether: ethyl acetate = 20: 1 to 3:1) gave **9d** as a white solid in 78% yield, mp 227-230 °C.

<sup>1</sup>H NMR (400 MHz, DMSO-d<sub>6</sub>) δ 10.95 (br s, 1H), 7.84 (dd, *J*=1.71, 8.19 Hz, 1H), 7.56(d, *J*=1.47 Hz, 1H), 7.00 (d, *J*=8.19 Hz, 1H), 3.81 (s, 3H), 1.60-1.79 (m, 2H), 1.45-1.57(m, 2H)

<sup>13</sup>C NMR (400 MHz, DMSO-d<sub>6</sub>) δ 178.5, 166.7, 146.7, 131.7, 129.5, 123.0, 120.6, 109.6, 52.3, 27.5, 19.3

HRMS (ESI-TOF) calcd for C<sub>12</sub>H<sub>11</sub>NO<sub>3</sub> [M + H]<sup>+</sup>: 218.08117 found: 218.08168

**5'-nitrospiro[cyclopropane-1,3'-indoline]-2'-one (9e)**

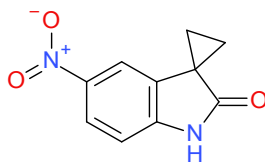

The title compound **9e** was prepared according to general procedure A. A purification by flash chromatography (petroleum ether: ethyl acetate = 20: 1 to 3:1) gave **9e** as a white solid in 91% yield, Decom. 235 °C.

<sup>1</sup>H NMR (400 MHz, DMSO-d<sub>6</sub>) δ 8.14 (dd, *J*=2.38, 8.62 Hz, 1H), 7.96 (d, *J*=2.32 Hz, 1H), 7.08 (d, *J*=8.68 Hz, 1H), 1.82-1.85 (m, 2H), 1.55-1.58 (m, 2H)

<sup>13</sup>C NMR (101 MHz, DMSO-d<sub>6</sub>) δ 178.5, 148.6, 142.4, 132.6, 124.4, 115.8, 109.7, 27.9, 20.0

HRMS (ESI-TOF) calcd for C<sub>10</sub>H<sub>8</sub>N<sub>2</sub>O<sub>3</sub> [M + H]<sup>+</sup>: 205.06077 found: 205.06097

**6'-fluorospiro[cyclopropane-1,3'-indoline]-2'-one (9f)**

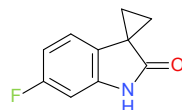

The title compound **9f** was prepared according to general procedure A. A purification by flash chromatography (petroleum ether: ethyl acetate = 20: 1 to 3:1) gave **9f** as a white solid in 83% yield, mp 180-182 °C.

<sup>1</sup>H NMR (400 MHz, METHANOL-d<sub>4</sub>) δ 6.89 (dd, *J*=5.14, 8.19 Hz, 1H), 6.68-6.77 (m, 2H), 1.55-1.65 (m, 4H)

<sup>13</sup>C NMR (101 MHz, METHANOL-d<sub>4</sub>) δ 180.2, 163.5-161.1 (d, *J*<sub>C-F</sub> = 241Hz), 142.5-142.4 (d, *J*<sub>C-F</sub> = 12.0Hz), 126.7-126.6 (d, *J*<sub>C-F</sub> = 2.5Hz), 119.6-119.5 (d, *J*<sub>C-F</sub> = 10.2Hz), 107.8-107.5 (d, *J*<sub>C-F</sub> = 24.3Hz), 97.9-97.6 (d, *J*<sub>C-F</sub> = 28.7Hz), 26.7, 18.1

HRMS (ESI-TOF) calcd for C<sub>10</sub>H<sub>8</sub>NFO [M + H]<sup>+</sup>: 178.06627 found: 178.06639

**6'-chlorospiro[cyclopropane-1,3'-indoline]-2'-one (9g)**

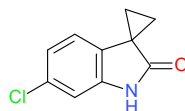

The title compound **9g** was prepared according to general procedure A. A purification by flash chromatography (petroleum ether: ethyl acetate = 20: 1 to 3:1) gave **9g** as a white solid in 95% yield, mp 230-236 °C.

$^1\text{H}$  NMR (400 MHz, DMSO- $d_6$ )  $\delta$  10.68 (br s, 1H), 6.94-7.03 (m, 2H), 6.90 (dd,  $J=0.67, 1.65$  Hz, 1H), 1.53-1.64 (m, 2H), 1.42-1.53 (m, 2H)

$^{13}\text{C}$  NMR (400 MHz, DMSO- $d_6$ )  $\delta$  178.1, 143.5, 131.2, 130.4, 121.2, 121.1, 109.8, 27.3, 19.1

HRMS (ESI-TOF) calcd for  $\text{C}_{10}\text{H}_8\text{ClNO}$   $[\text{M} + \text{H}]^+$ : 194.03672 found: 194.03727

**6'-bromospiro[cyclopropane-1,3'-indoline]-2'-one (9h)**

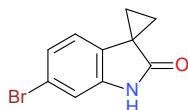

The title compound **9h** was prepared according to general procedure A. A purification by flash chromatography (petroleum ether: ethyl acetate = 20: 1 to 3:1) gave **9h** as a white solid in 87% yield, mp 190-194 °C.

$^1\text{H}$  NMR (400 MHz, DMSO- $d_6$ )  $\delta$  10.67 (br s, 1H), 7.11 (dd,  $J=1.83, 7.95$  Hz, 1H), 7.03 (d,  $J=1.71$  Hz, 1H), 6.93 (d,  $J=7.95$  Hz, 1H), 1.53-1.63 (m, 2H), 1.45-1.53 (m, 2H)

$^{13}\text{C}$  NMR (400 MHz, DMSO- $d_6$ )  $\delta$  178.0, 143.8, 130.8, 124.0, 121.5, 119.3, 112.5, 27.3, 19.1

HRMS (ESI-TOF) calcd for  $\text{C}_{10}\text{H}_8\text{BrNO}$   $[\text{M} + \text{H}]^+$ : 237.98620 found: 237.98672

**5',6'-difluorospiro[cyclopropane-1,3'-indoline]-2'-one (9i)**

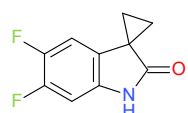

The title compound **9i** was prepared according to general procedure A. A purification by flash chromatography (petroleum ether: ethyl acetate = 20: 1 to 3:1) gave **9i** as a white solid in 95% yield, mp 213-215 °C.

$^1\text{H}$  NMR (400 MHz, METHANOL- $d_4$ )  $\delta$  6.86-6.98 (m, 2H), 1.57-1.71 (m, 5H)

$^{13}\text{C}$  NMR (100 MHz, METHANOL- $d_4$ )  $\delta$  179.8, 150.7-148.1 (dd,  $^1J_{\text{C-F}} = 14.3\text{ Hz}$ ,  $^2J_{\text{C-F}} = 242.9\text{ Hz}$ ), 147.7-145.2 (dd,  $^1J_{\text{C-F}} = 13.4\text{ Hz}$ ,  $^2J_{\text{C-F}} = 239.7\text{ Hz}$ ), 137.3-137.2 (d,  $J_{\text{C-F}}$ )

= 12.7Hz), 127.2-127.1 (dd,  $^1J_{C-F}$  = 3.5Hz,  $^2J_{C-F}$  = 7.3Hz), 108.4-108.2 (d,  $J_{C-F}$  = 20.8Hz), 99.4-99.1(d,  $J_{C-F}$  = 23.1Hz), 27.2, 18.5

HRMS (ESI-TOF) calcd for  $C_{10}H_7NF_2O$   $[M + H]^+$ : 196.05685 found: 196.05695

#### 5',6'-dichlorospiro[cyclopropane-1,3'-indoline]-2'-one (9j)

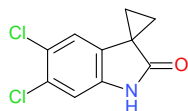

The title compound **9j** was prepared according to general procedure A. A purification by flash chromatography (petroleum ether: ethyl acetate = 20: 1 to 3:1) gave **9j** as a white solid in 91% yield, mp 242-246 °C.

$^1H$  NMR (400 MHz, DMSO- $d_6$ )  $\delta$  10.78 (s, 1H), 7.32 (s, 1H), 7.06 (s, 1H), 1.59-1.77 (m, 2H), 1.50 (q,  $J$ =3.83 Hz, 2H)

$^{13}C$  NMR (400 MHz, DMSO- $d_6$ )  $\delta$  177.8, 142.2, 132.6, 129.0, 123.6, 121.9, 111.2, 27.6, 19.6

HRMS (ESI-TOF) calcd for  $C_{10}H_7Cl_2NO$   $[M + H]^+$ : 227.99775 found: 227.99830

#### 4'-fluorospiro[cyclopropane-1,3'-indoline]-2'-one (9k)

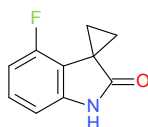

The title compound **9k** was prepared according to general procedure A. A purification by flash chromatography (petroleum ether: ethyl acetate = 20: 1 to 3:1) gave **9k** as a white solid in 82% yield, mp 168-170 °C.

$^1H$  NMR (400 MHz, DMSO- $d_6$ )  $\delta$  10.80 (br s, 1H), 7.19 (dt,  $J$ =5.75, 8.13 Hz, 1H), 6.67-6.86 (m, 2H), 1.71-1.78 (m, 2H), 1.39-1.62 (m, 2H)

$^{13}C$  NMR (100 MHz, DMSO- $d_6$ )  $\delta$  177.4, 158.2-155.8 (d,  $J_{C-F}$  = 243Hz),, 144.6-144.5 (d,  $J_{C-F}$  = 9.6Hz), 128.8-128.7 (d,  $J_{C-F}$  = 9.6Hz), 116.3-116.2 (d,  $J_{C-F}$  = 18.1Hz), 108.8-108.6 (d,  $J_{C-F}$  = 19.6Hz), 106.7(d,  $J_{C-F}$  = 3.1Hz), 26.4, 16.5



HRMS (ESI-TOF) calcd for C<sub>10</sub>H<sub>8</sub>NFO [M + H]<sup>+</sup>: 178.06627 found: 178.06621

**4'-bromospiro[cyclopropane-1,3'-indoline]-2'-one (9l)**

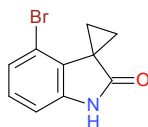

The title compound **9l** was prepared according to general procedure A. A purification by flash chromatography (petroleum ether: ethyl acetate = 20: 1 to 3:1) gave **9l** as a white solid in 85% yield, mp 211-214 °C.

<sup>1</sup>H NMR (400 MHz, METHANOL-d<sub>4</sub>) δ 7.08-7.14 (m, 2H), 6.98 (dd, *J*=2.32, 6.48 Hz, 1H), 2.31 (q, *J*=3.79 Hz, 2H), 1.49 (q, *J*=3.87 Hz, 2H)

<sup>13</sup>C NMR (400 MHz, METHANOL-d<sub>4</sub>) δ 178.8, 143.5, 128.0, 127.4, 125.6, 114.5, 108.9, 28.7, 14.5

HRMS (ESI-TOF) calcd for C<sub>10</sub>H<sub>8</sub>BrNO [M + H]<sup>+</sup>: 237.98620 found: 237.98630

**7'-methoxyspiro[cyclopropane-1,3'-indoline]-2'-one (9m)**

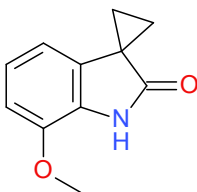

The title compound **9m** was prepared according to general procedure A with 1.5 equiv Zn(OTf)<sub>2</sub>. A purification by flash chromatography (petroleum ether: ethyl acetate = 20: 1 to 3:1) gave **9m** as a white solid in 82% yield, mp 166-169 °C.

<sup>1</sup>H NMR (400 MHz, METHANOL-d<sub>4</sub>) δ 6.99 (dd, *J*=7.58, 8.31 Hz, 1H), 6.89 (d, *J*=8.41Hz, 1H), 6.56 (dd, *J*=0.92, 7.52 Hz, 1H), 3.91 (s, 3H), 1.54-1.65 (m, 4H)

<sup>13</sup>C NMR (101 MHz, METHANOL-d<sub>4</sub>) δ 179.8, 144.3, 132.1, 129.6, 122.5, 111.0, 109.3, 54.8, 27.6, 18.2

HRMS (ESI-TOF) calcd for C<sub>11</sub>H<sub>11</sub>NO<sub>2</sub> [M + H]<sup>+</sup>: 190.08626 found: 190.08630

**7'-chlorospiro[cyclopropane-1,3'-indoline]-2'-one (9n)**

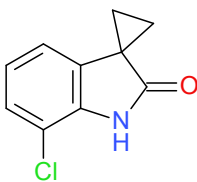

The title compound **9n** was prepared according to general procedure A with 1.5 equiv  $\text{Zn}(\text{OTf})_2$ . A purification by flash chromatography (petroleum ether: ethyl acetate = 20: 1 to 3:1) gave **9n** as a white solid in 85% yield, mp 158-163 °C.

$^1\text{H}$  NMR (400 MHz, DMSO- $d_6$ )  $\delta$  10.97 (br s, 1H), 7.17-7.30 (m, 1H), 6.94-6.95 (m, 2H), 1.57-1.66 (m, 2H), 1.46-1.57 (m, 2H)

$^{13}\text{C}$  NMR (400 MHz, DMSO- $d_6$ )  $\delta$  178.1, 139.6, 133.4, 127.0, 122.9, 118.3, 114.1, 28.2, 19.5

HRMS (ESI-TOF) calcd for  $\text{C}_{10}\text{H}_8\text{ClNO}$   $[\text{M} + \text{H}]^+$ : 194.03672 found: 194.03709

#### spiro[1H-pyrrolo[2,3-b]pyridine-3,1'-cyclopropane]-2-one (**9o**)

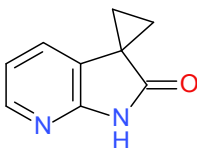

The title compound **9o** was prepared according to general procedure A. A purification by flash chromatography (petroleum ether: ethyl acetate = 10: 1 to 1:1) gave **9o** as a white solid in 95% yield, mp 164-167 °C.

$^1\text{H}$  NMR (400 MHz, METHANOL- $d_4$ )  $\delta$  8.02-8.16 (m, 1H), 7.34 (dd,  $J=1.47$ , 7.46 Hz, 1H), 7.00 (dd,  $J=5.32$ , 7.40 Hz, 1H), 1.59-1.80 (m, 4H)

$^{13}\text{C}$  NMR (101 MHz, METHANOL- $d_4$ )  $\delta$  179.1, 155.9, 144.7, 126.7, 126.1, 117.5, 26.6, 18.2

HRMS (ESI-TOF) calcd for  $\text{C}_9\text{H}_8\text{N}_2\text{O}$   $[\text{M} + \text{H}]^+$ : 161.07094 found: 161.07114

#### spiro[4H-thieno[3,2-b]pyrrole-6,1'-cyclopropane]-5-one (**9p**)

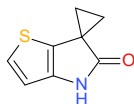

The title compound **9p** was prepared according to general procedure A. A purification by flash chromatography (petroleum ether: ethyl acetate = 10: 1 to 10:3) gave **9p** as a white solid in 90% yield, mp 186-188 °C.

<sup>1</sup>HNMR (400 MHz, METHANOL-d<sub>4</sub>) δ 7.26 (d, *J*=5.01 Hz, 1H), 6.84 (d, *J*=5.01 Hz, 1H), 1.52-1.62 (m, 4H)

<sup>13</sup>CNMR (101 MHz, METHANOL-d<sub>4</sub>) δ 182.6, 142.2, 124.2, 121.7, 112.5, 29.2, 18.1

HRMS (ESI-TOF) calcd for C<sub>9</sub>H<sub>9</sub>BN<sub>2</sub>O<sub>3</sub> [M + H]<sup>+</sup>: 166.03211 found: 166.03235

#### 5'-hydroxyspiro[cyclopropane-1,3'-indoline]-2'-one (**9q**)

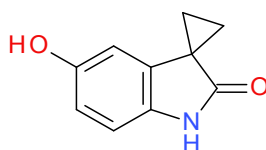

The title compound **9q** was prepared according to general procedure A. A purification by flash chromatography (petroleum ether: ethyl acetate = 4: 1 to 1:1) gave **9q** as a white solid in 78% yield, mp 243-246 °C.

<sup>1</sup>H NMR (400 MHz, METHANOL-d<sub>4</sub>) δ 6.80 (d, *J*=8.31 Hz, 1H), 6.64 (dd, *J*=2.45, 8.31Hz, 1H), 6.40 (d, *J*=2.45 Hz, 1H), 1.60-1.63 (m, 2H), 1.51-1.54 (m, 2H)

<sup>13</sup>C NMR (101 MHz, METHANOL-d<sub>4</sub>) δ 180.0, 152.9, 133.5, 132.5, 112.7, 110.0, 106.3, 27.4, 18.1

HRMS (ESI-TOF) calcd for C<sub>10</sub>H<sub>9</sub>NO<sub>2</sub> [M + H]<sup>+</sup>: 176.07060 found: 176.07035

#### 5'-(4,4,5,5-tetramethyl-1,3,2-dioxaborolan-2-yl)spiro[cyclopropane-1,3'-indoline]-2'-one (**9r**)

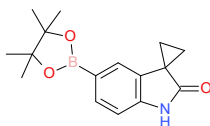

The title compound **9r** was prepared according to general procedure A. A purification by flash chromatography (petroleum ether: ethyl acetate = 10: 1 to 1:1) gave **9r** as a white solid in 85% yield, mp 212-215 °C.

<sup>1</sup>H NMR (400 MHz, METHANOL-d<sub>4</sub>) δ 7.63 (dd, *J*=1.10, 7.82 Hz, 1H), 7.29 (s, 1H), 6.99 (d, *J*=7.82 Hz, 1H), 1.58-1.69 (m, 4H), 1.34 (s, 12H)

<sup>13</sup>C NMR (101 MHz, METHANOL-d<sub>4</sub>) δ 180.1, 144.2, 133.7, 130.5, 124.4, 108.9, 83.5, 26.8, 23.8, 18.2

HRMS (ESI-TOF) calcd for C<sub>16</sub>H<sub>20</sub>BN<sub>2</sub>O<sub>3</sub> [M + H]<sup>+</sup>: 285.16453 found: 285.16483

**(2-oxospiro[1H-pyrrolo[2,3-b]pyridine-3,1'-cyclopropane]-5-yl)boronic acid (9s)**

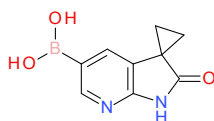

The title compound **9s** was prepared according to general procedure A. A purification by flash chromatography (DCM: MeOH = 10:0.1 to 10:1) gave **9s** as a white solid in 75% yield, Decom. 320 °C.

<sup>1</sup>H NMR (400 MHz, DMSO-d<sub>6</sub>) δ 11.19 (s, 1H), 8.44 (d, *J*=1.59 Hz, 1H), 8.06 (s, 2H), 7.59 (d, *J*=1.47 Hz, 1H), 1.56-1.67 (m, 2H), 1.46-1.56 (m, 2H)

<sup>13</sup>C NMR (101 MHz, DMSO-d<sub>6</sub>) δ 178.2, 158.3, 152.2, 132.0, 124.6, 26.8, 18.6

HRMS (ESI-TOF) calcd for C<sub>9</sub>H<sub>9</sub>BN<sub>2</sub>O<sub>3</sub> [M + H]<sup>+</sup>: 204.08153 found: 204.08150

**4'-[2-(dipropylamino)ethyl]spiro[cyclopropane-1,3'-indoline]-2'-one (1b)**

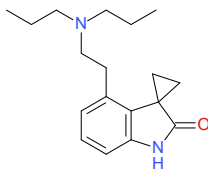

The title compound **1b** was prepared according to general procedure A. A purification by flash chromatography (petroleum ether: ethyl acetate = 10: 1 to 1:2) gave **1b** as a white solid in 85% yield, mp 99-101 °C.

<sup>1</sup>H NMR (400 MHz, METHANOL-d<sub>4</sub>) δ 7.14 (t, *J*=7.50 Hz, 1H), 6.81-6.87 (m, 2H), 2.60-2.71 (m, 2H), 2.44-2.60 (m, 6H), 1.83-1.98 (m, 2H), 1.49-1.61 (m, 6H), 0.94 (t, *J*=7.34 Hz, 6H)

<sup>13</sup>C NMR (101 MHz, METHANOL-d<sub>4</sub>) δ 179.6, 141.9, 134.3, 126.8, 126.5, 123.3, 107.7, 56.1, 55.7, 27.6, 27.4, 19.4, 16.3, 10.8

HRMS (ESI-TOF) calcd for C<sub>18</sub>H<sub>26</sub>N<sub>2</sub>O [M + H]<sup>+</sup>: 287.21179 found: 287.21204

**5'-[2-[4-(1,2-benzothiazol-3-yl)piperazin-1-yl]ethyl]-6'-chloro-spiro[cyclopropane-1,3'-indoline]-2'-one (2b)**

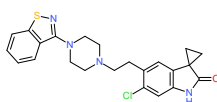

The title compound **2b** was prepared according to general procedure A. A purification by flash chromatography (petroleum ether: ethyl acetate = 10: 1 to 1:5) gave **2b** as a white solid in 95% yield, mp 262-264 °C.

<sup>1</sup>H NMR (400 MHz, DMSO-d<sub>6</sub>) δ 10.60 (s, 1H), 8.06 (d, *J*=8.93 Hz, 2H), 7.56 (t, *J*=7.89 Hz, 1H), 7.22-7.48 (m, 1H), 7.01 (s, 1H), 6.90 (s, 1H), 3.37-3.56 (m, 4H), 2.76-2.99 (m, 2H), 2.63-2.74 (m, 4H), 2.52-2.61 (m, 2H), 1.52-1.68 (m, 2H), 1.41-1.52 (m, 2H)

<sup>13</sup>C NMR (101 MHz, DMSO-d<sub>6</sub>) δ 178.1, 164.0, 152.5, 141.6, 130.8, 130.3, 128.3, 127.8, 124.9, 124.6, 122.2, 121.5, 110.2, 58.6, 52.9, 50.2, 30.7, 27.2, 19.0

HRMS (ESI-TOF) calcd for C<sub>23</sub>H<sub>23</sub>ClN<sub>4</sub>OS [M + H]<sup>+</sup>: 439.13539 found: 439.13549

**N-methyl-N-[3-[[[2-[(2'-oxospiro[cyclopropane-1,3'-indoline]-5'-yl)amino]-5-(trifluoromethyl)pyrimidin-4-yl]amino]methyl]-2-pyridyl]methanesulfonamide (3b)**

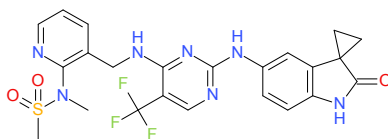

The title compound **3b** was prepared according to general procedure A. A purification by flash chromatography (DCM: MeOH = 100: 1 to 10:2) gave **3b** as a white solid in 92% yield, mp 267-269 °C.

<sup>1</sup>H NMR (400 MHz, DMSO-d<sub>6</sub>) δ 10.40 (br s, 1H), 9.21-9.46 (m, 1H), 8.44 (dd, *J*=1.77,4.71 Hz, 1H), 8.20 (s, 1H), 7.69 (br d, *J*=7.21 Hz, 1H), 7.39-7.50 (m, 2H), 7.11-7.26 (m, 1H), 7.09 (s, 1H), 6.66 (br d, *J*=7.58 Hz, 1H), 4.75 (br d, *J*=5.50 Hz, 2H), 3.04-3.18 (m, 6H), 1.22-1.44 (m, 4H)

<sup>13</sup>C NMR (101 MHz, DMSO-d<sub>6</sub>) δ 178.2, 161.6, 158.8, 155.4(d, *J*<sub>C-F</sub> = 6.5Hz), 155.3, 152.6, 147.9, 137.8, 137.4, 134.7, 134.1, 131.4, 126.9, 124.6, 124.2, 119.5, 113.0, 109.4, 37.5, 36.4, 27.5, 23.9, 18.7

HRMS (ESI-TOF) calcd for C<sub>23</sub>H<sub>22</sub>F<sub>3</sub>N<sub>7</sub>O<sub>3</sub>S [M + H]<sup>+</sup>: 534.15297 found: 534.15284

**1'-methylspiro[cyclopropane-1,3'-indoline]-2'-one (12a)**

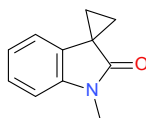

- The title compound **12a** was prepared according to general procedure B. A purification by flash chromatography (petroleum ether: ethyl acetate = 100: 1 to 10:3) gave **12a** as a white solid in 97% yield, mp 81-83 °C.
- The title compound **12a** was prepared according to general procedure A with 98% yield.

<sup>1</sup>H NMR (400 MHz, DMSO-d<sub>6</sub>) δ 7.25 (ddd, *J*=3.06, 5.75, 7.82 Hz, 1H), 6.98-7.08 (m, 3H), 3.21 (s, 3H), 1.46-1.64 (m, 4H)

<sup>13</sup>C NMR (101 MHz, DMSO-d<sub>6</sub>) δ 176.3, 143.7, 130.6, 127.2, 122.2, 119.3, 108.7, 27.0, 26.8, 18.8

HRMS (ESI-TOF) calcd for C<sub>11</sub>H<sub>11</sub>NO [M + H]<sup>+</sup>: 174.09134 found: 174.09128

**tert-butyl 2'-oxospiro[cyclopropane-1,3'-indoline]-1'-carboxylate (12b)**

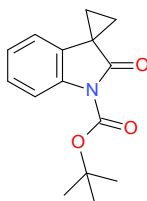

- a. The title compound **12b** was prepared according to general procedure **B**. A purification by flash chromatography (petroleum ether: ethyl acetate = 100: 1 to 10:3) gave **12b** as a white solid in 85% yield, mp 111-112 °C.
- b. The title compound **12b** was prepared according to general procedure **A** with 50% yield.

<sup>1</sup>H NMR (400 MHz, METHANOL-d<sub>4</sub>) δ 7.84 (d, *J*=7.91 Hz, 1H), 7.29 (dt, *J*=1.34, 7.89 Hz, 1H), 7.17 (dt, *J*=1.04, 7.55 Hz, 1H), 6.98 (dd, *J*=0.86, 7.46 Hz, 1H), 1.64-1.76 (m, 13H)

<sup>13</sup>C NMR (101 MHz, METHANOL-d<sub>4</sub>) δ 176.2, 149.2, 139.0, 129.5, 126.7, 124.2, 118.2, 114.5, 84.1, 27.2, 26.9, 20.5

HRMS (ESI-TOF) calcd for C<sub>15</sub>H<sub>17</sub>NO<sub>3</sub> [M + H]<sup>+</sup>: 260.12812 found: 204.06580

**1'-benzyl-6'-methoxy-spiro[cyclopropane-1,3'-indoline]-2'-one (12c)**

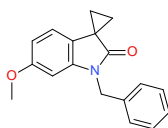

The title compound **12c** was prepared according to general procedure **B**. A purification by flash chromatography (petroleum ether: ethyl acetate = 100: 1 to 10:3) gave **12c** as a white solid in 87% yield, mp 116-117 °C.

<sup>1</sup>H NMR (400 MHz, DMSO-d<sub>6</sub>) δ 7.23-7.38 (m, 5H), 6.85 (d, *J*=7.80 Hz, 1H), 6.72 (s, 1H), 6.72 (d, *J*=7.50 Hz, 2H), 4.93 (s, 2H), 3.33 (s, 2H), 1.52-1.70 (m, 4H)

<sup>13</sup>C NMR (101 MHz, DMSO-d<sub>6</sub>) δ 176.4, 155.9, 137.4, 136.1, 132.1, 129.1, 127.8, 127.7, 111.8, 109.7, 107.0, 56.0, 43.5, 27.5, 19.3

HRMS (ESI-TOF) calcd for C<sub>18</sub>H<sub>17</sub>NO<sub>2</sub> [M+H]<sup>+</sup>: 280.13321 found: 280.13339

**1'-methyl-2'-oxo-spiro[cyclopropane-1,3'-indoline]-6'-carboxylic acid (12d)**

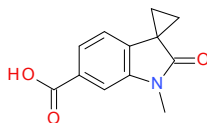

- The title compound **12d** was prepared according to general procedure **B**. A purification by flash chromatography (DCM: MeOH = 100: 1 to 10:2) gave **12d** as a white solid in 95% yield, mp 272-275 °C.
- The title compound **12d** was prepared according to general procedure **A** with 97% yield.
- To a 25 mL Schlenk tube were added amide 11d (0.2 mmol, 1.0 equiv), vinyl diphenylsulfonium triflate (86.9 mg, 0.24 mmol, 1.2 equiv), water (1 mL). The mixture was stirred at room temperature for 2 min and DBU (91.2 mg, 0.6 mmol, 3.0 equiv) was added into it. The mixture was stirred for 4 hours at room temperature till the reaction completed, quenched with saturated ammonium chloride solution (5 mL), and was extracted with EtOAc (3 x 50 mL). The combined organic layer washed with H<sub>2</sub>O (2 x 10 mL), dried with anhydrous sodium sulfate. After concentration, product was purified using column chromatography on silica gel using eluent (DCM: MeOH = 100: 1 to 10:2).

<sup>1</sup>H NMR (400 MHz, DMSO-d<sub>6</sub>) δ 12.94 (s, 1H), 7.65 (dd, *J*=1.34, 7.70 Hz, 1H), 7.54 (d, *J*=1.10 Hz, 1H), 7.14 (d, *J*=7.70 Hz, 1H), 3.25-3.27 (m, 3H), 1.65-1.77 (m, 2H), 1.58-1.65 (m, 2H)

<sup>13</sup>C NMR (400 MHz, DMSO-d<sub>6</sub>) δ 176.1, 167.7, 143.9, 136.1, 129.9, 123.9, 119.3, 108.9, 27.5, 26.8, 19.8

HRMS (ESI-TOF) calcd for C<sub>12</sub>H<sub>11</sub>NO<sub>3</sub> [M + H]<sup>+</sup>: 218.08117 found: 218.08148

**5'-amino-1'-methyl-spiro[cyclopropane-1,3'-indoline]-2'-one (12e)**



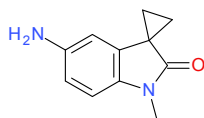

- a. The title compound **12e** was prepared according to general procedure A. A purification by flash chromatography (DCM: MeOH = 100: 1 to 10:2) gave **12e** as a white solid in 82% yield, mp 146-149 °C.
- b. To a 25 mL Schlenk tube were added amine **11d** (0.2 mmol, 1.0 equiv), vinyl diphenylsulfonium triflate (76 mg, 0.21 mmol, 1.05 equiv), DMSO (1 mL). The mixture was stirred at room temperature for 2 min and DBU (91.2 mg, 0.6 mmol, 3.0 equiv) was added into it. The mixture was heating for 1 hour at 130 degree with microwave till the reaction completed, quenched with saturated ammonium chloride solution (5 mL), and was extracted with EtOAc (3 x 50 mL). The combined organic layer washed with H<sub>2</sub>O (2 x 10 mL), dried with anhydrous sodium sulfate. After concentration, product was purified using column chromatography on silica gel using eluent (DCM: MeOH = 100: 1 to 10:2).

<sup>1</sup>H NMR (400 MHz, DMSO-d<sub>6</sub>) δ 6.73 (d, *J*=8.19 Hz, 1H), 6.47 (dd, *J*=2.08, 8.19 Hz, 1H), 6.24 (d, *J*=2.08 Hz, 1H), 4.71 (br s, 2H), 3.12 (s, 3H), 1.37-1.47 (m, 4H)

<sup>13</sup>C NMR (100 MHz, DMSO-d<sub>6</sub>) δ/ppm = 175.7, 144.6, 133.9, 131.3, 112.1, 109.0, 106.3, 27.2, 26.7, 18.4

HRMS (ESI-TOF) calcd for C<sub>11</sub>H<sub>12</sub>N<sub>2</sub>O [M + H]<sup>+</sup>: 189.10224 found: 189.10212

**2-(2'-oxospiro[cyclopropane-1,3'-indoline]-1'-yl)ethyl-diphenyl-sulfonium;trifluoromethanesulfonate (**13a**)**

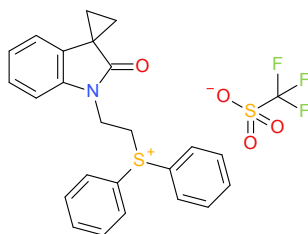

To a 25 mL Schlenk tube were added oxaindole **7a** (0.2 mmol, 1.0 equiv), vinyl diphenylsulfonium triflate (86.9 mg, 0.24 mmol, 1.2 equiv) and DCM (1 mL). The mixture was stirred for 2 minutes at room temperature and TEA (91.2 mg, 0.6 mmol,

3.0 equiv) was added into it. After stirring for 4 hour at room temperature, the mixture was diluted with DCM (20mL) and washed with water (3 x 5mL). The organic layer was dried over sodium sulfate and concentrated under reduced pressure. The residue solid was washed with ethyl acetate (3 x 1mL) to afford the pure product which was dried over vacuum in 32% yield as white solid.

<sup>1</sup>H NMR (400 MHz, METHANOL-d<sub>4</sub>) δ 7.83-8.05 (m, 4H), 7.68-7.83 (m, 2H), 7.55-7.67 (m, 4H), 7.26-7.46 (m, 2H), 7.20 (d, J=7.83 Hz, 1H), 6.98-7.15 (m, 1H), 6.85 (dd, J=0.61, 7.46 Hz, 1H), 4.64-4.87 (m, 2H), 4.55 (dd, J=4.71, 6.30 Hz, 2H), 1.35-1.59 (m, 4H)

<sup>13</sup>C NMR (101 MHz, METHANOL-d<sub>4</sub>) δ 177.9, 140.7, 134.2, 130.2, 129.8, 130.9, 126.7, 125.5, 122.8, 118.6, 108.4, 43.5, 35.9, 26.3, 19.2

## 5. NMR spectra of product

<sup>1</sup>H NMR of Compound 9a

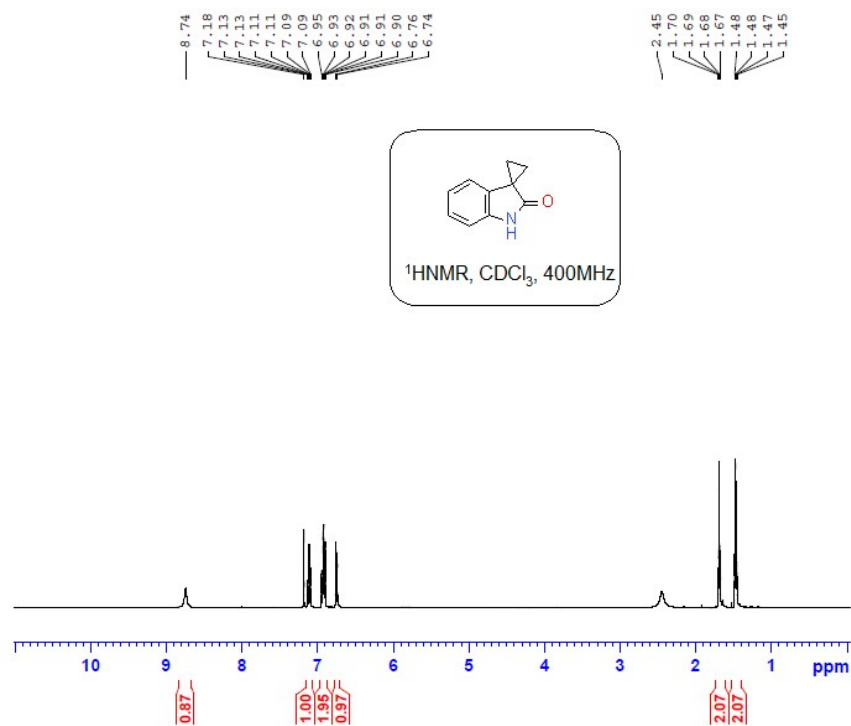

<sup>13</sup>C NMR of Compound 9a

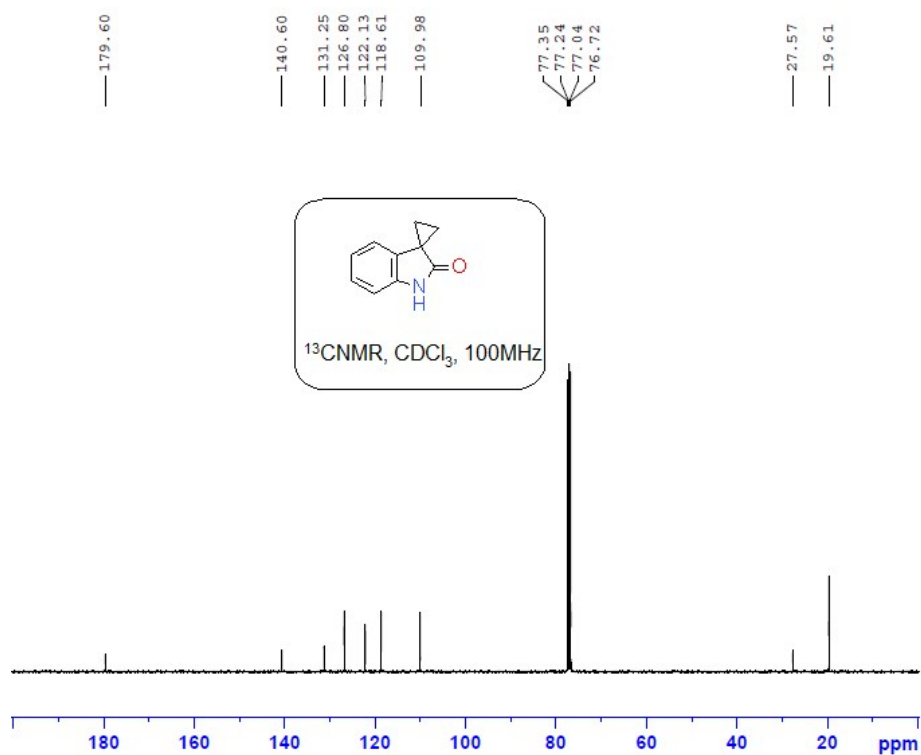

<sup>1</sup>H NMR of Compound 9b

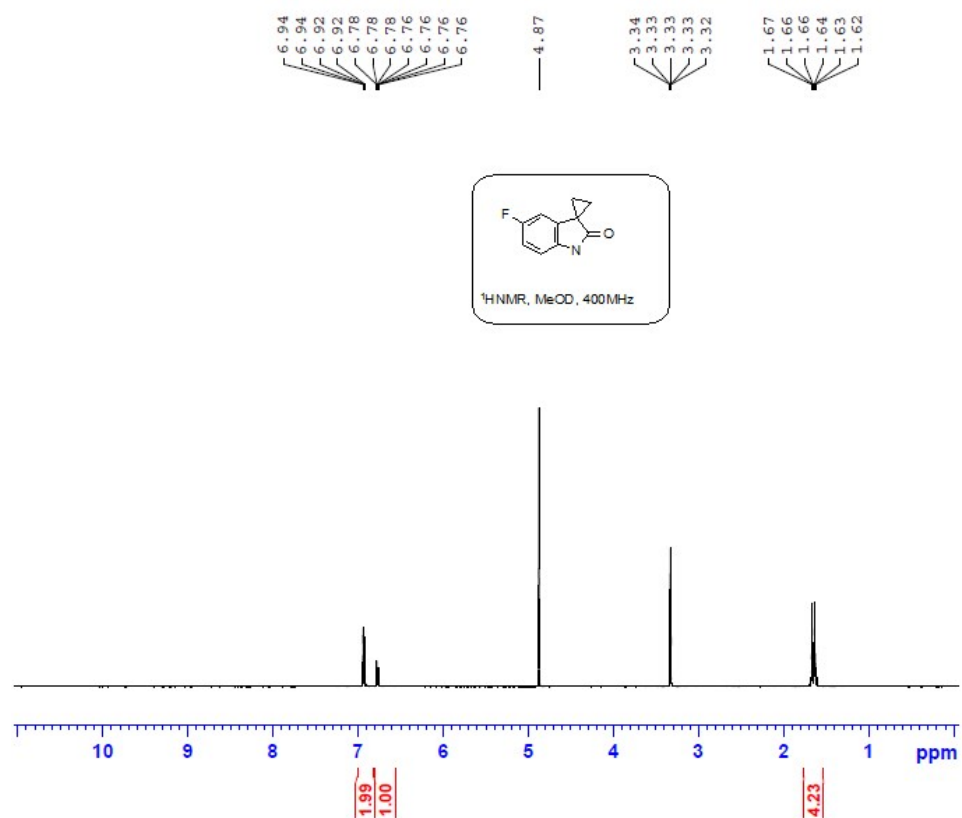

<sup>13</sup>C NMR of Compound 9b

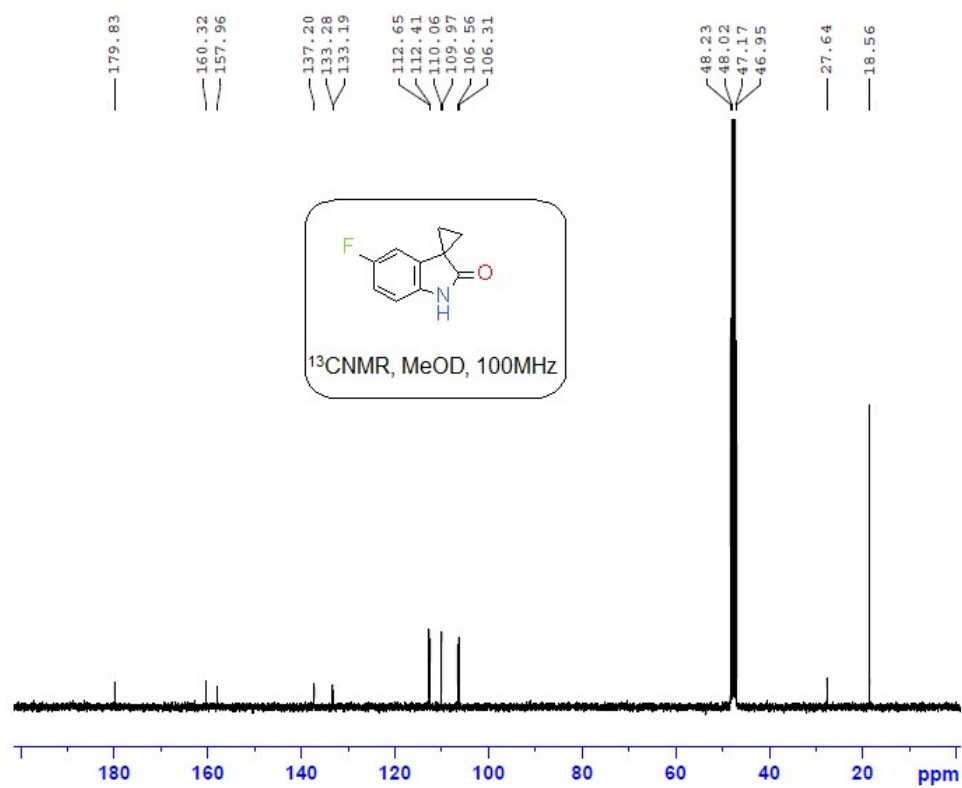

<sup>1</sup>H NMR of Compound 9c

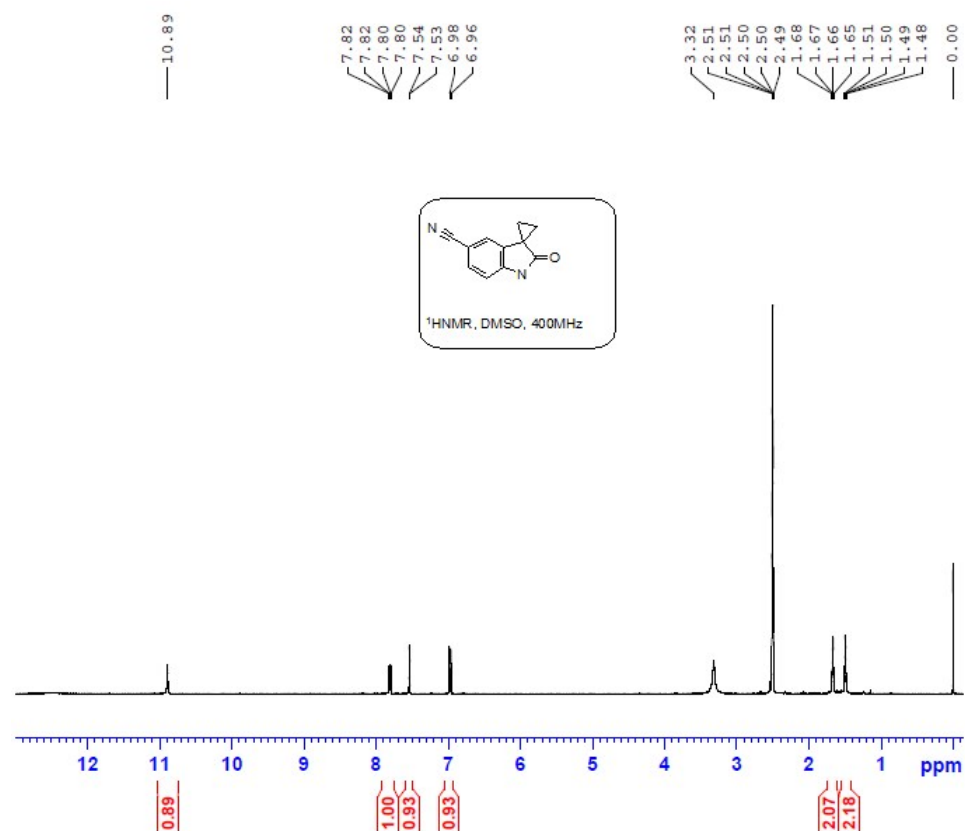

<sup>13</sup>C NMR of Compound 9c

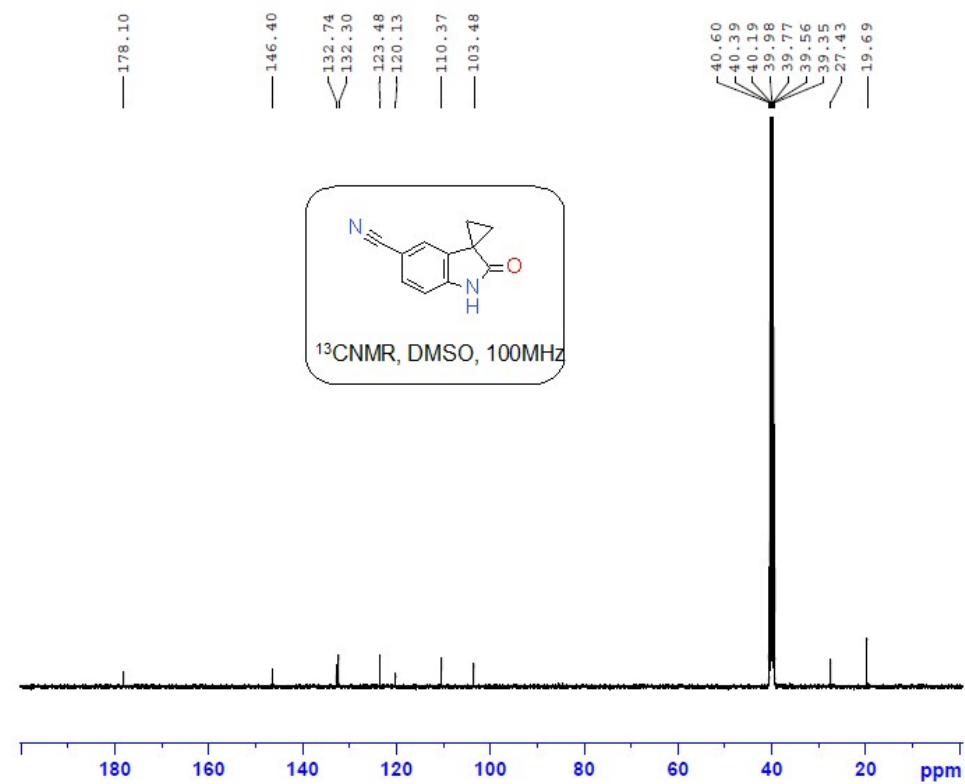

# <sup>1</sup>H NMR of Compound 9d

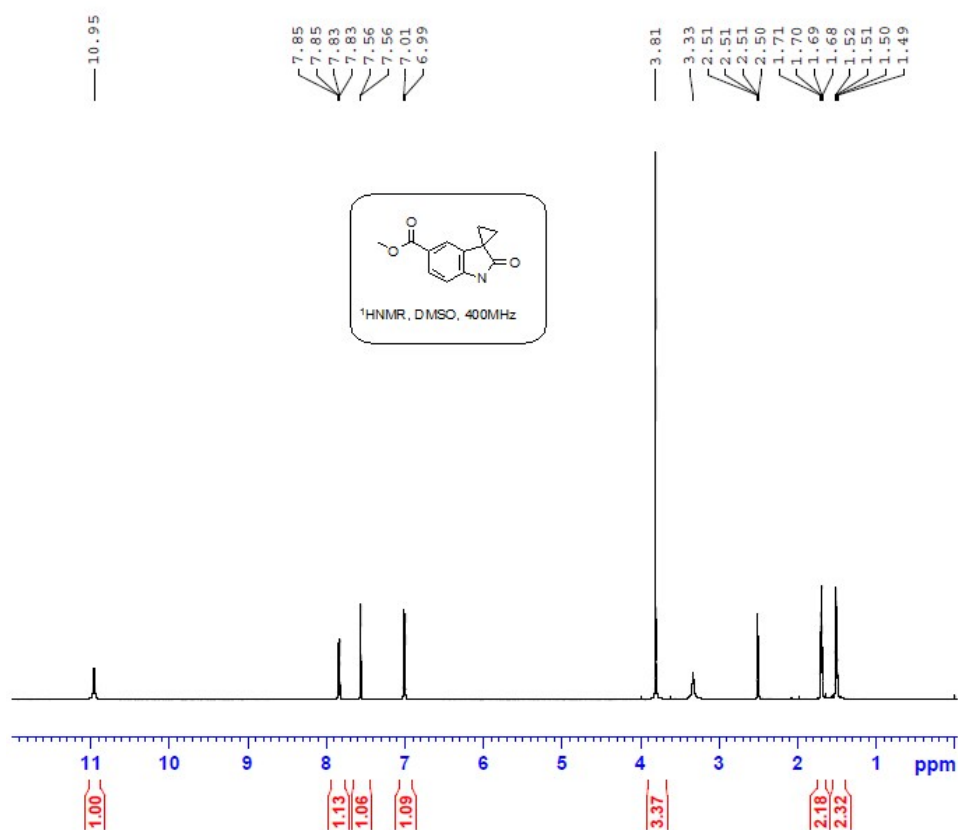

# <sup>13</sup>C NMR of Compound 9d

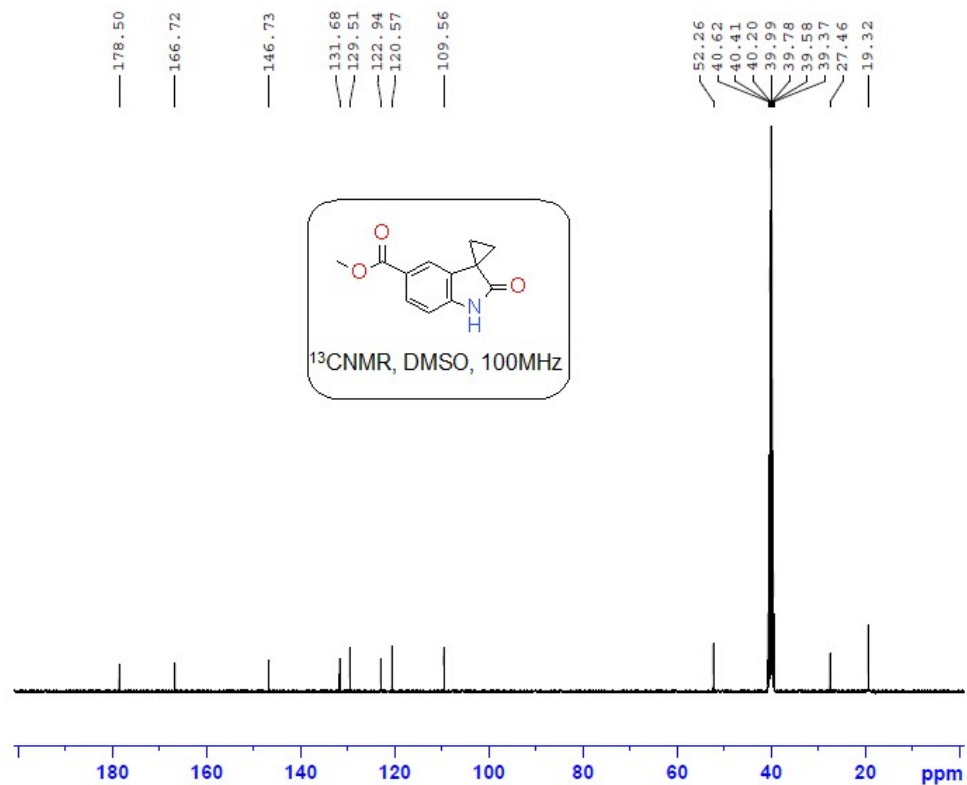

# <sup>1</sup>H NMR of Compound 9e

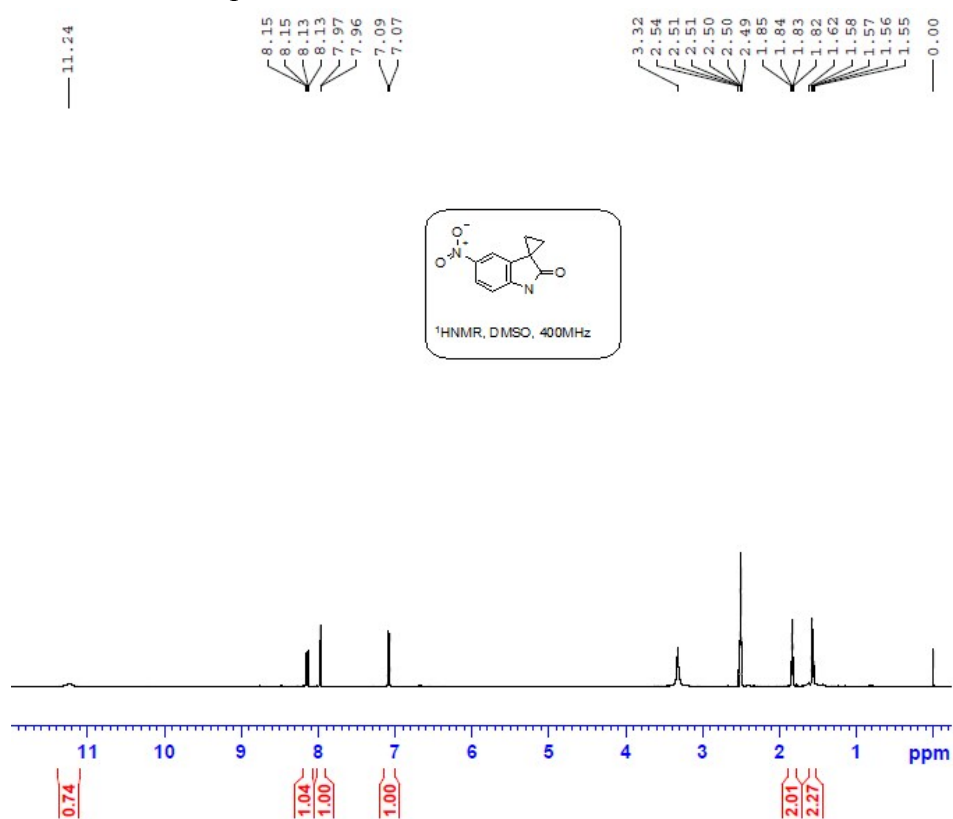

# <sup>13</sup>C NMR of Compound 9e

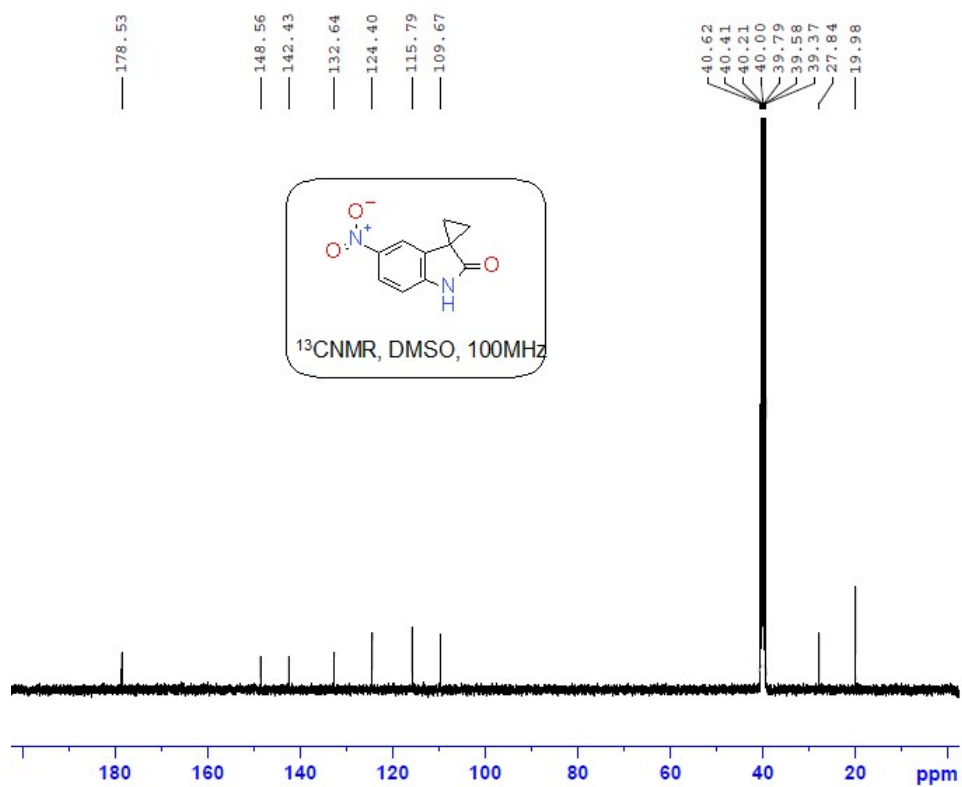

<sup>1</sup>H NMR of Compound 9f

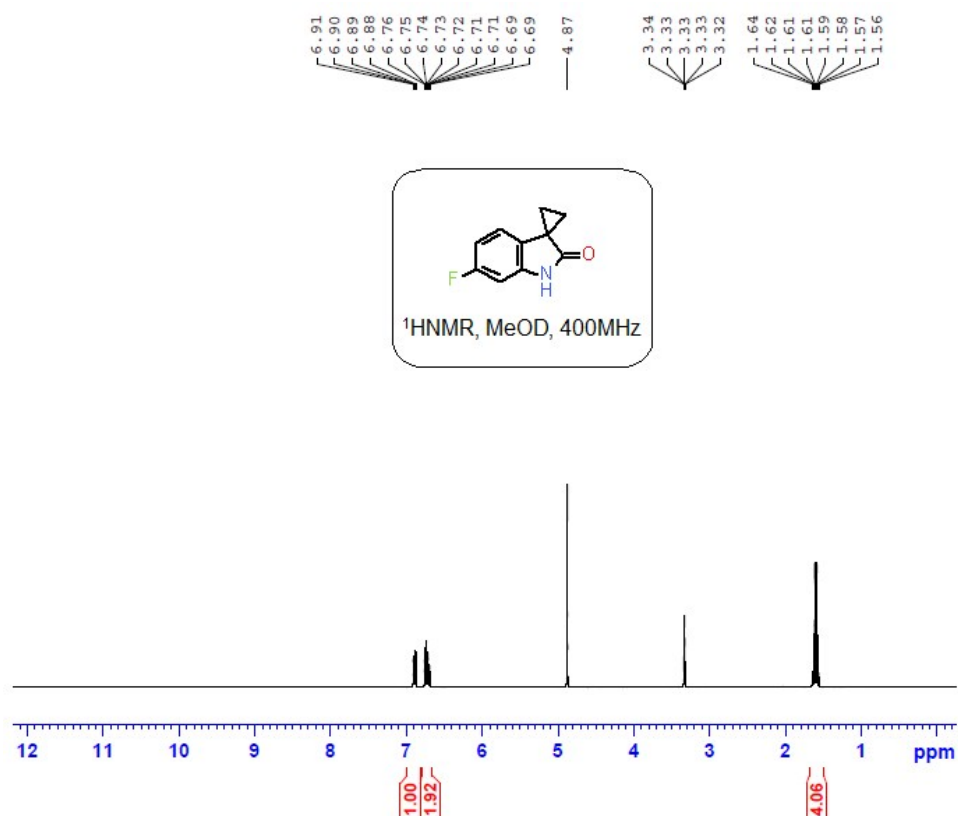

<sup>13</sup>C NMR of Compound 9f

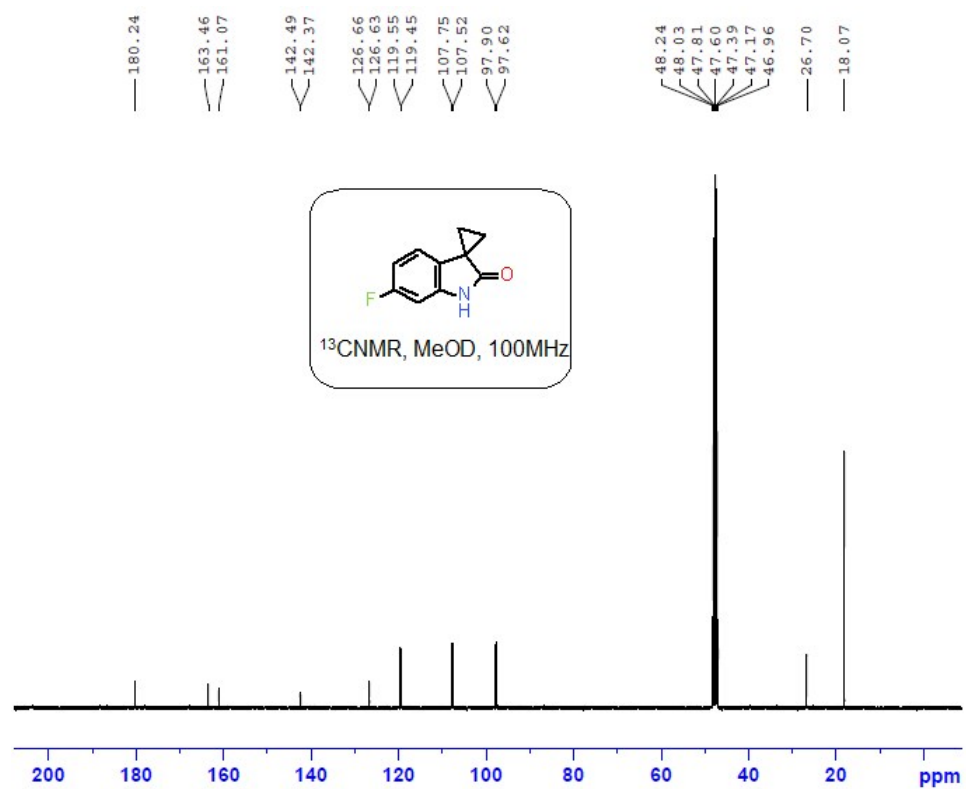



<sup>1</sup>H NMR of Compound 9g

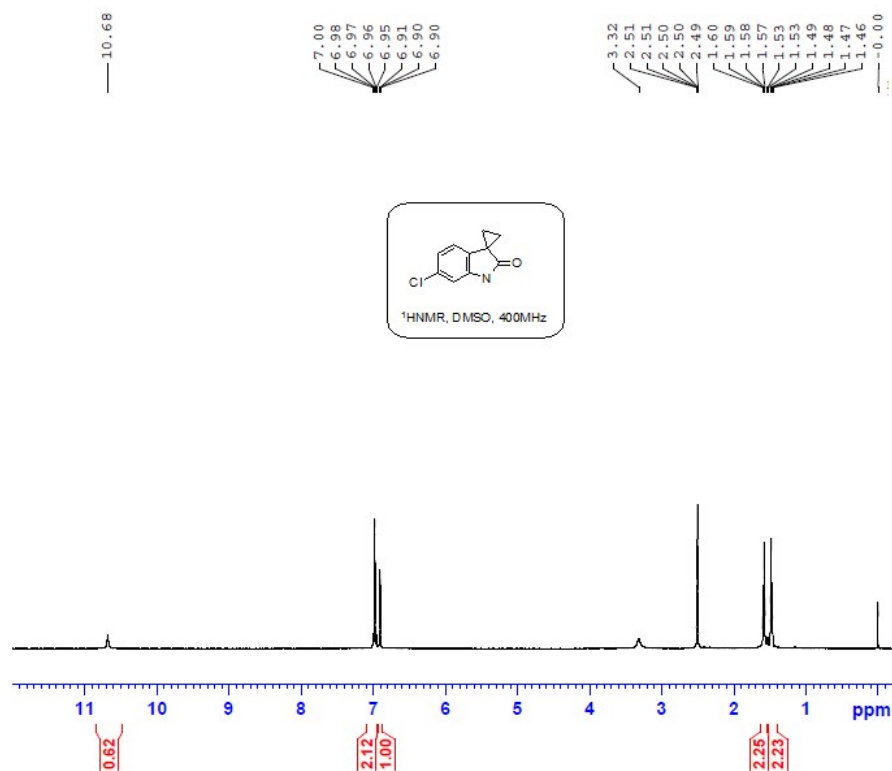

<sup>13</sup>C NMR of Compound 9g

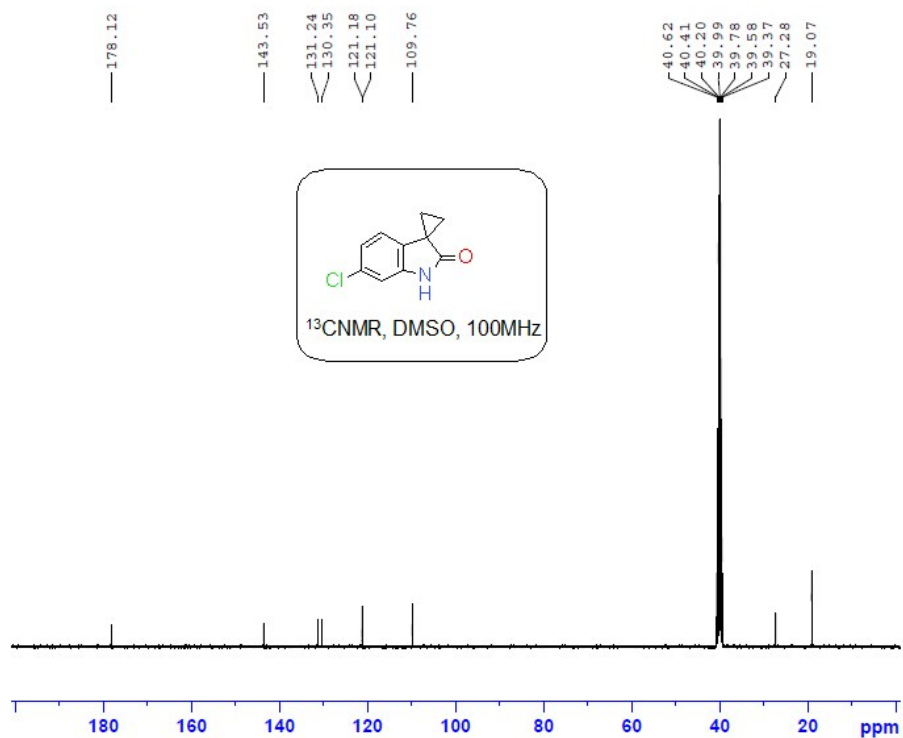

# <sup>1</sup>H NMR of Compound 9h

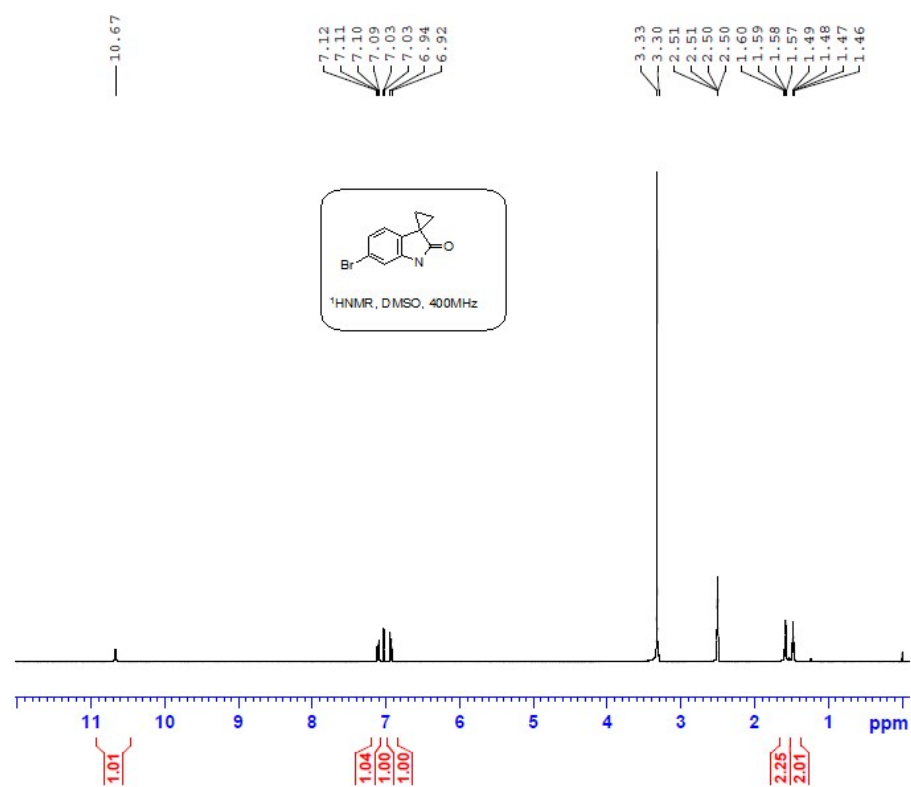

# <sup>13</sup>C NMR of Compound 9h

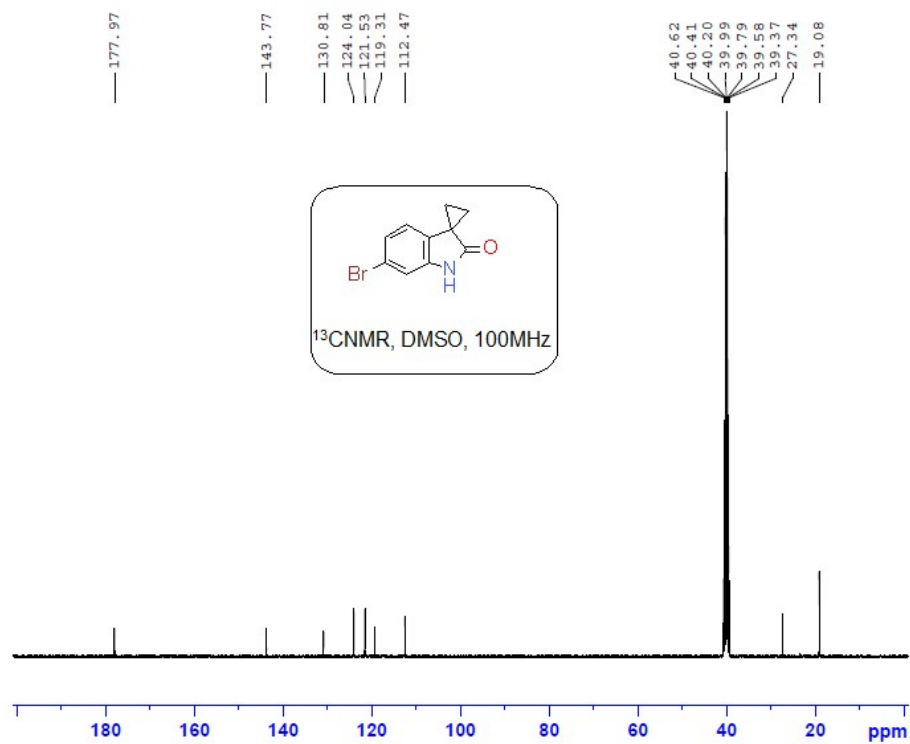

# <sup>1</sup>H NMR of Compound 9i

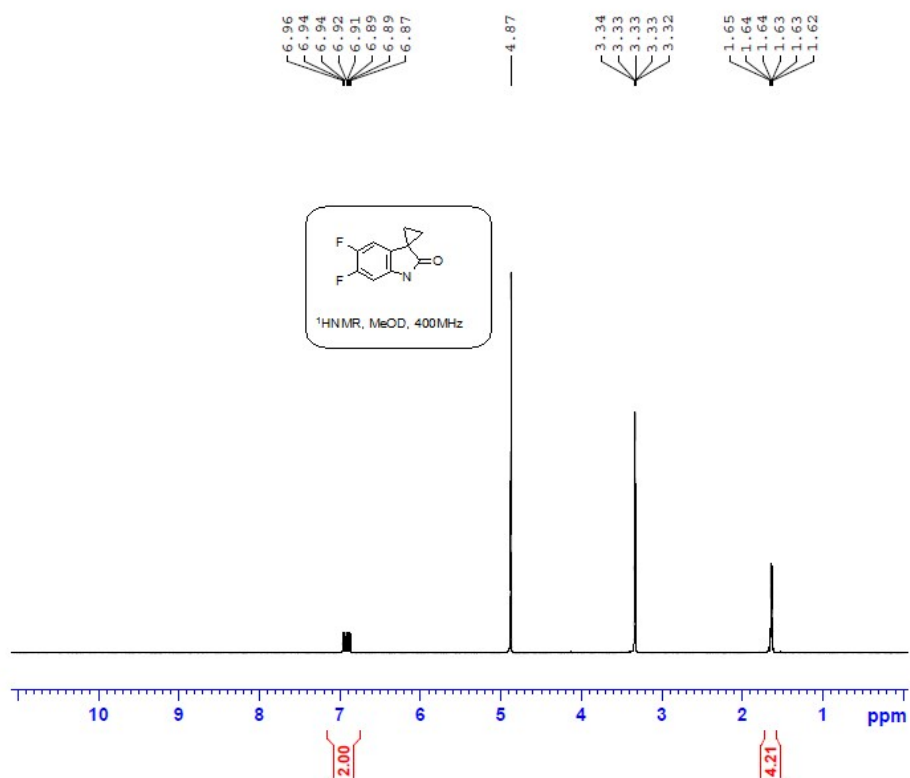

# <sup>13</sup>C NMR of Compound 9i

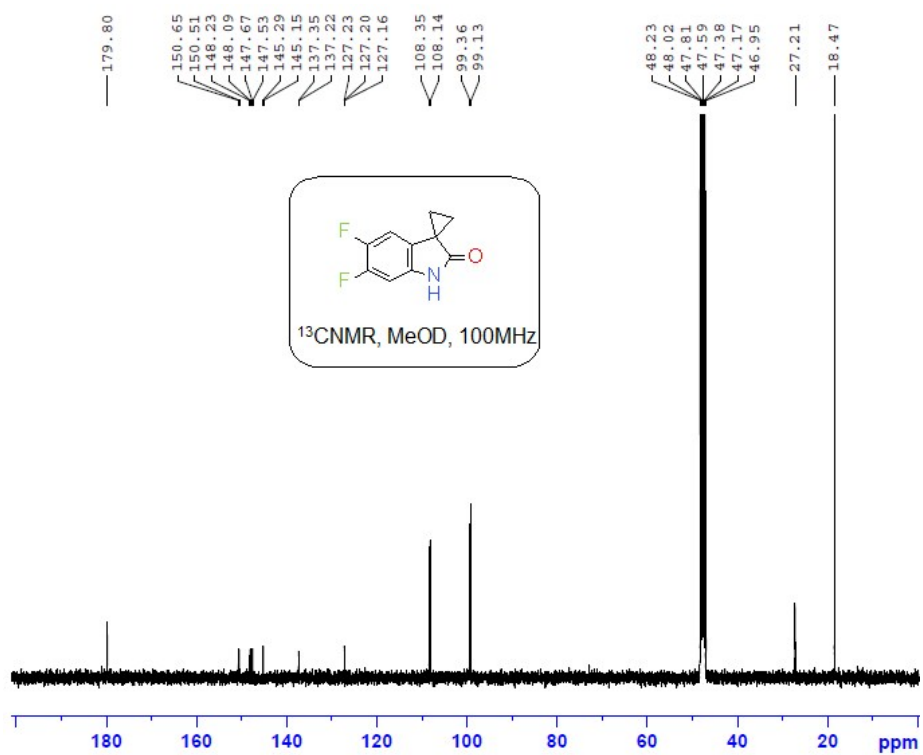

# <sup>1</sup>H NMR of Compound 9j

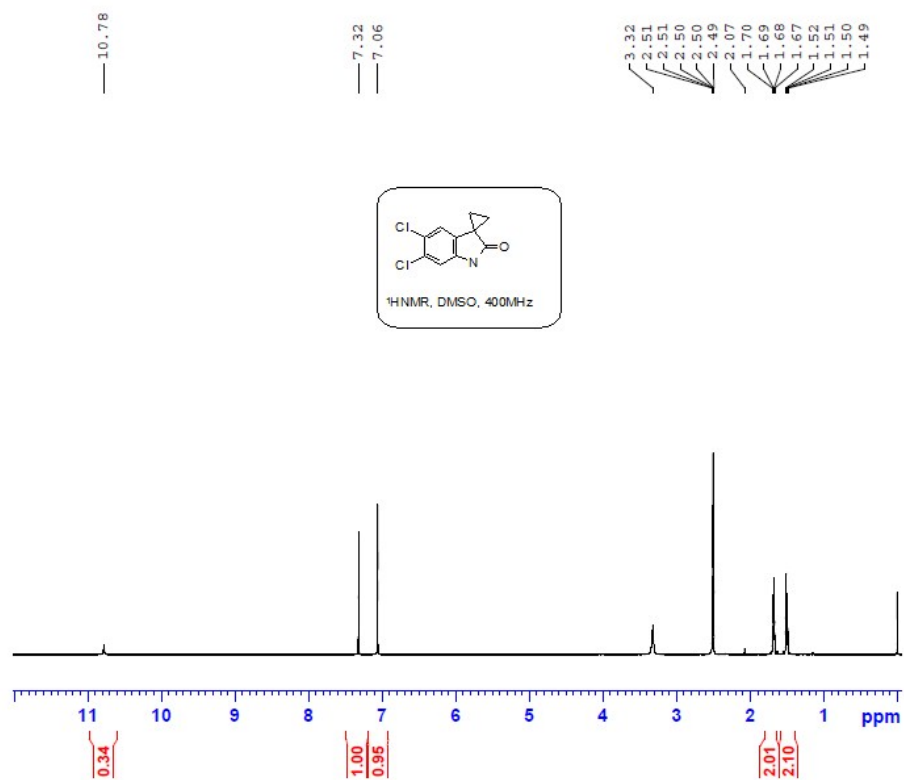

# <sup>13</sup>C NMR of Compound 9j

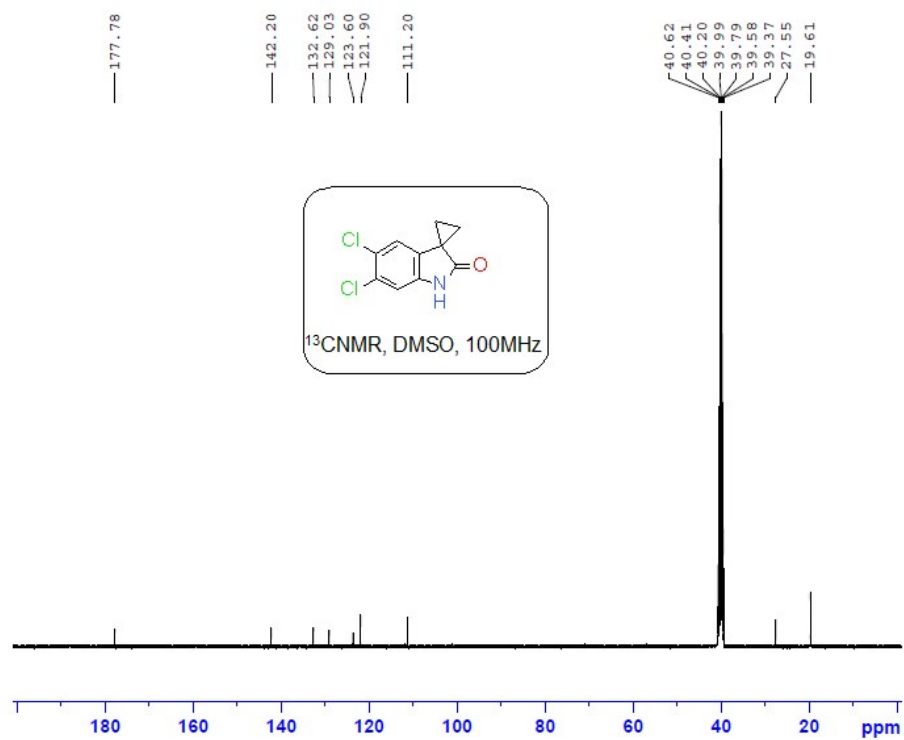

# <sup>1</sup>H NMR of Compound 9k

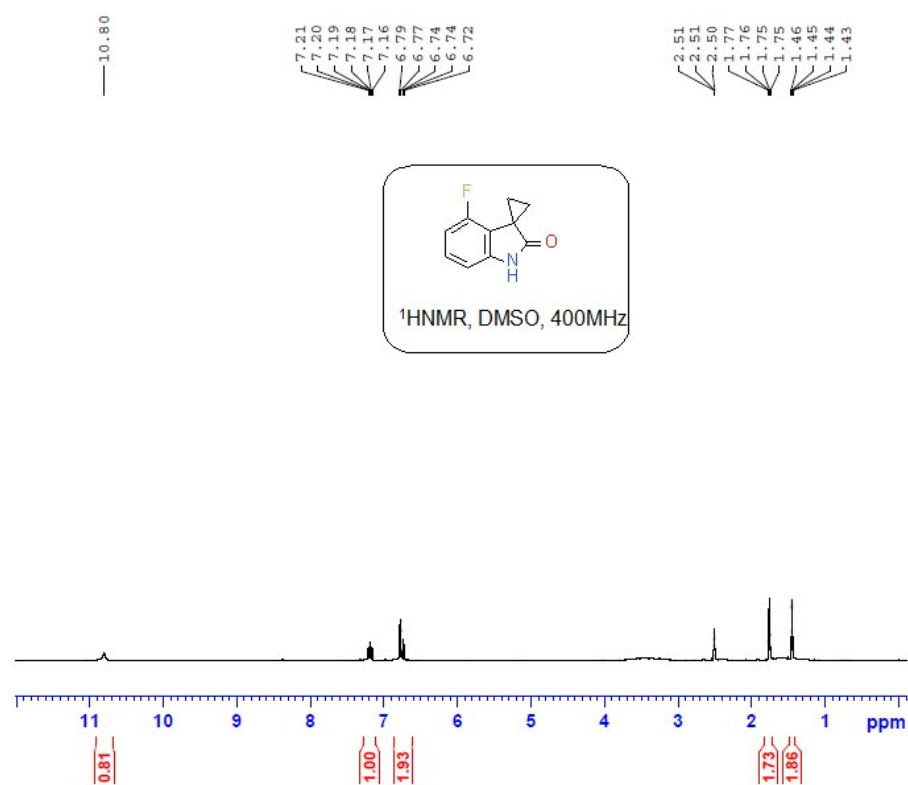

# <sup>13</sup>C NMR of Compound 9k

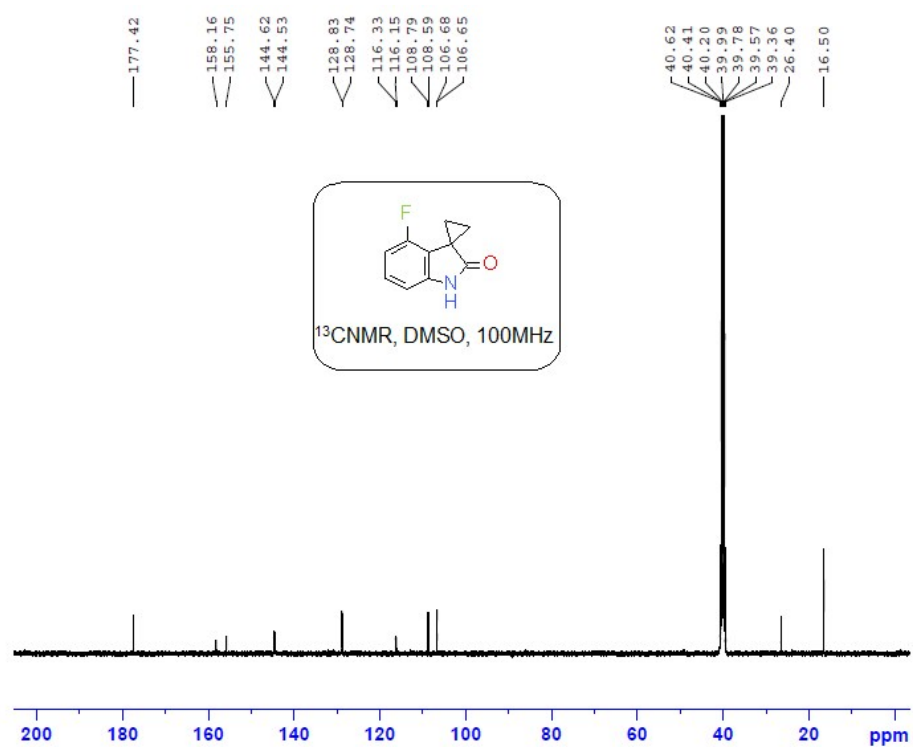

# <sup>1</sup>H NMR of Compound 9l

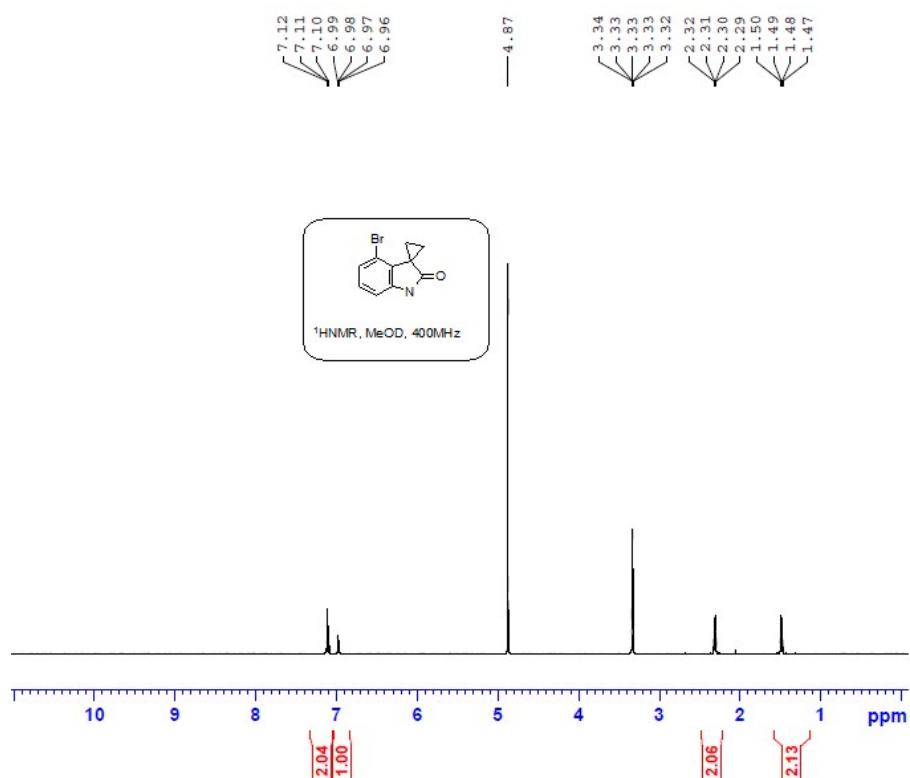

# <sup>13</sup>C NMR of Compound 9l

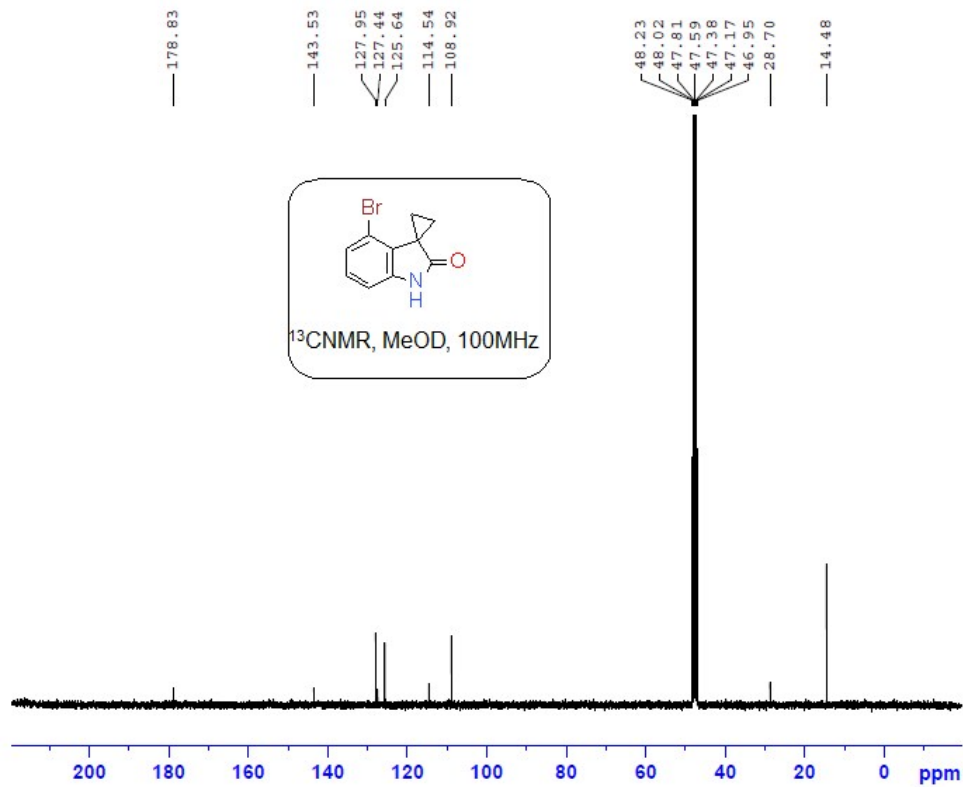

# <sup>1</sup>H NMR of Compound 9m

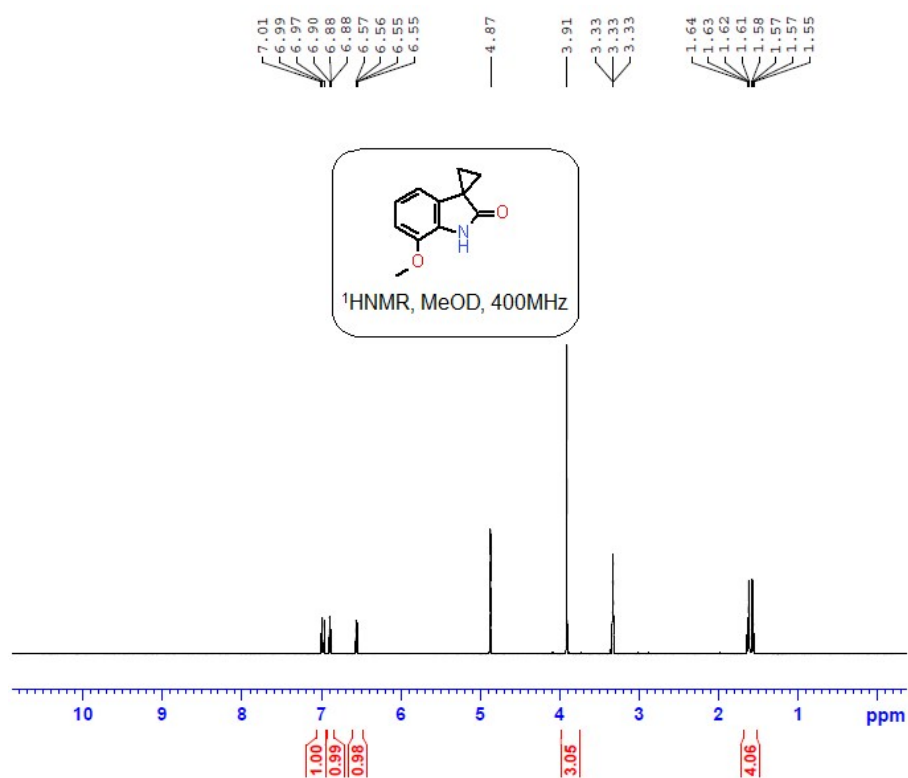

# <sup>13</sup>C NMR of Compound 9m

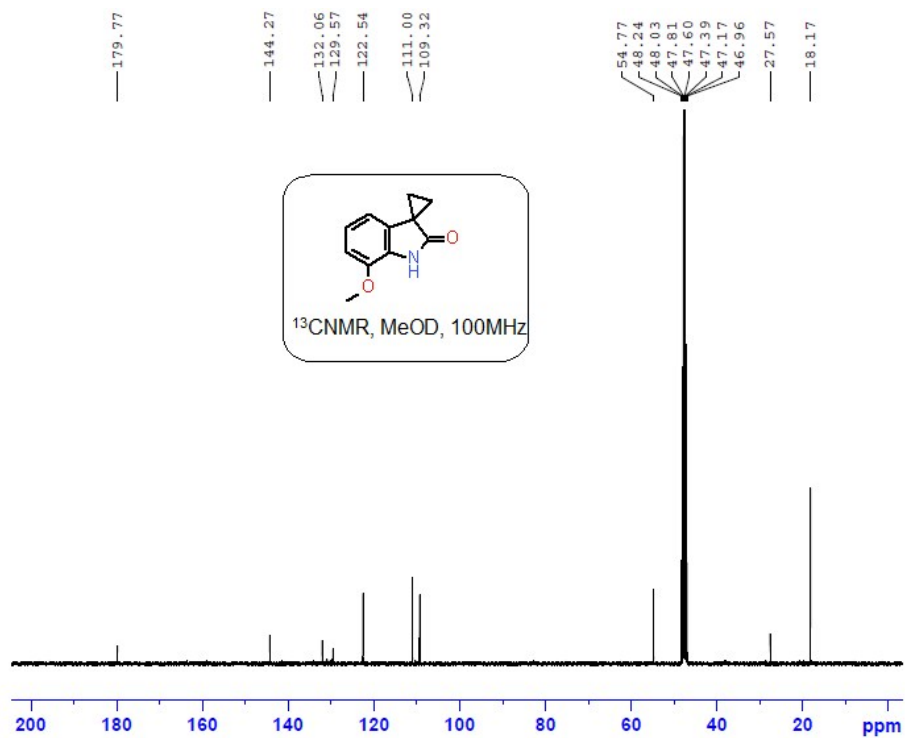

# <sup>1</sup>H NMR of Compound 9n

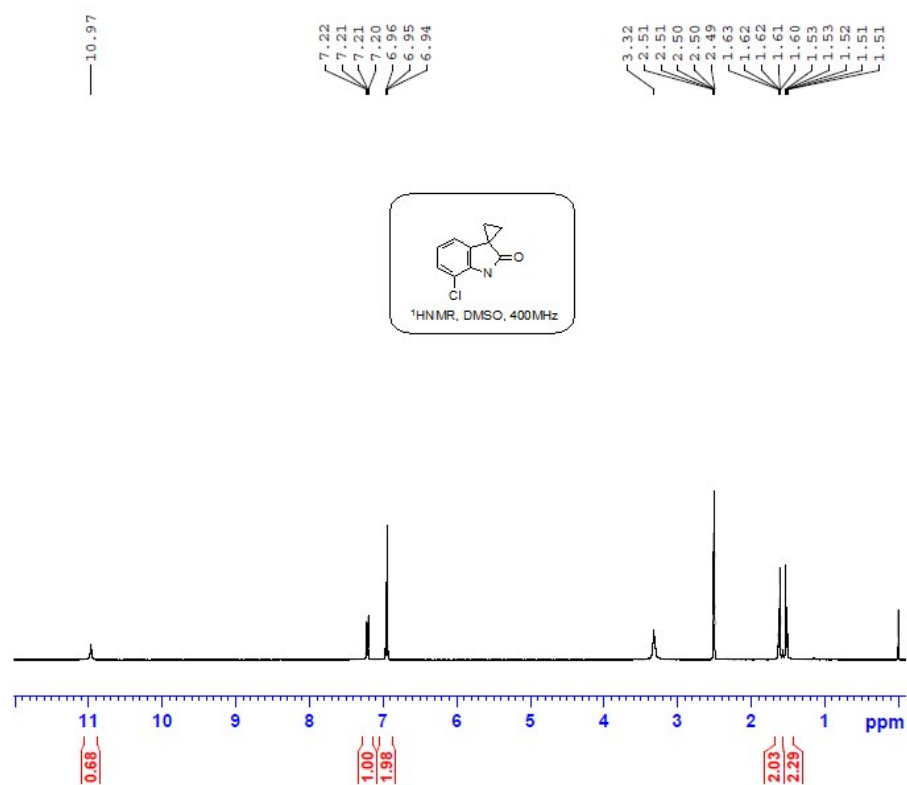

# <sup>13</sup>C NMR of Compound 9n

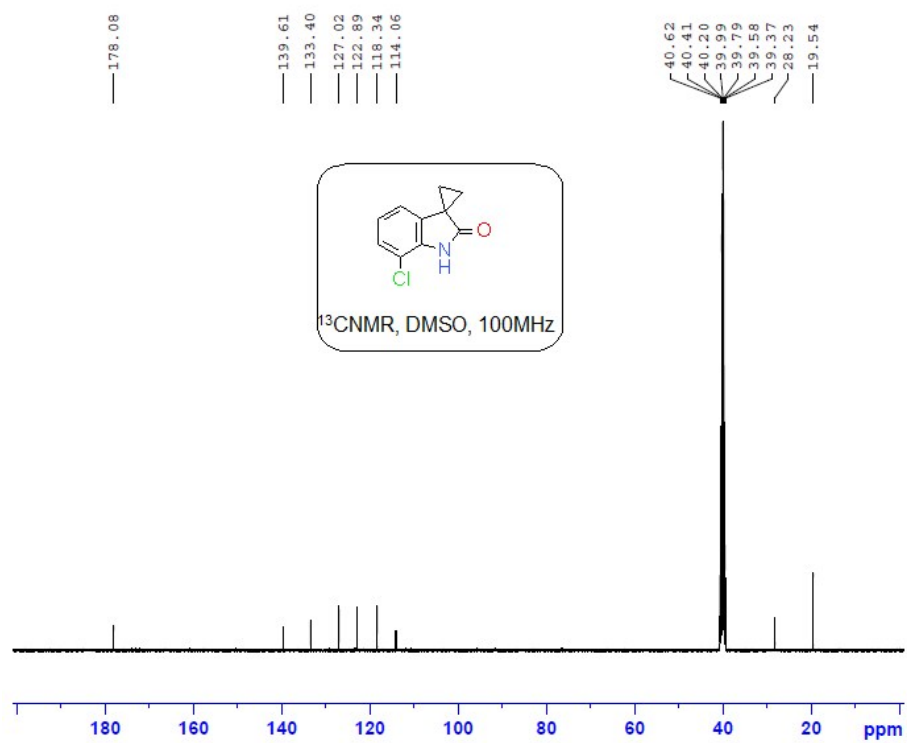



# <sup>1</sup>H NMR of Compound 9o

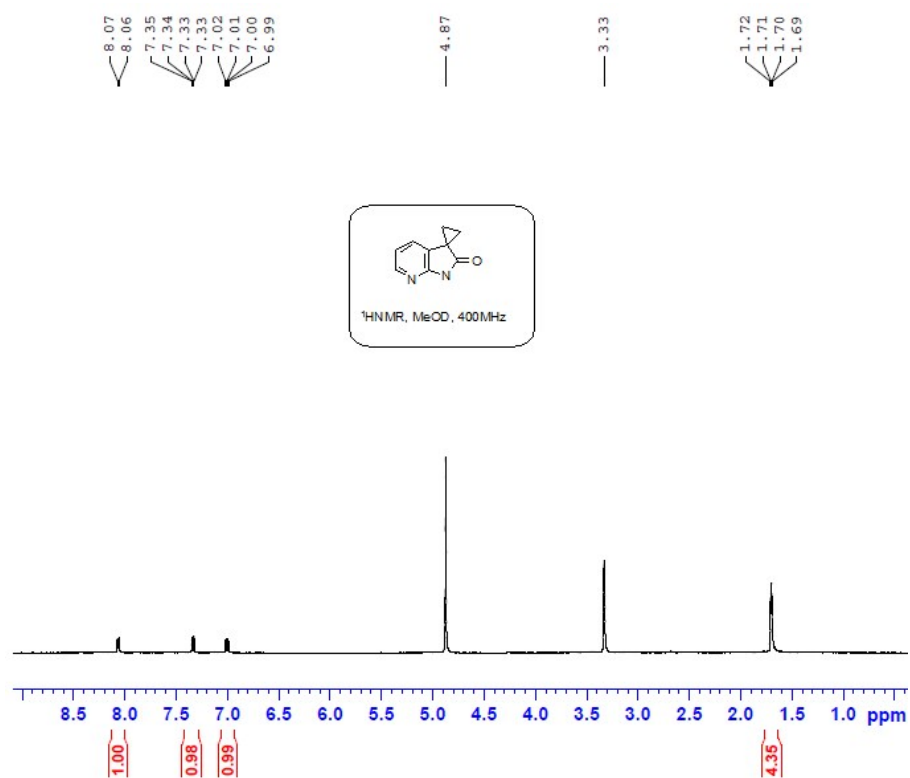

# <sup>13</sup>C NMR of Compound 9o

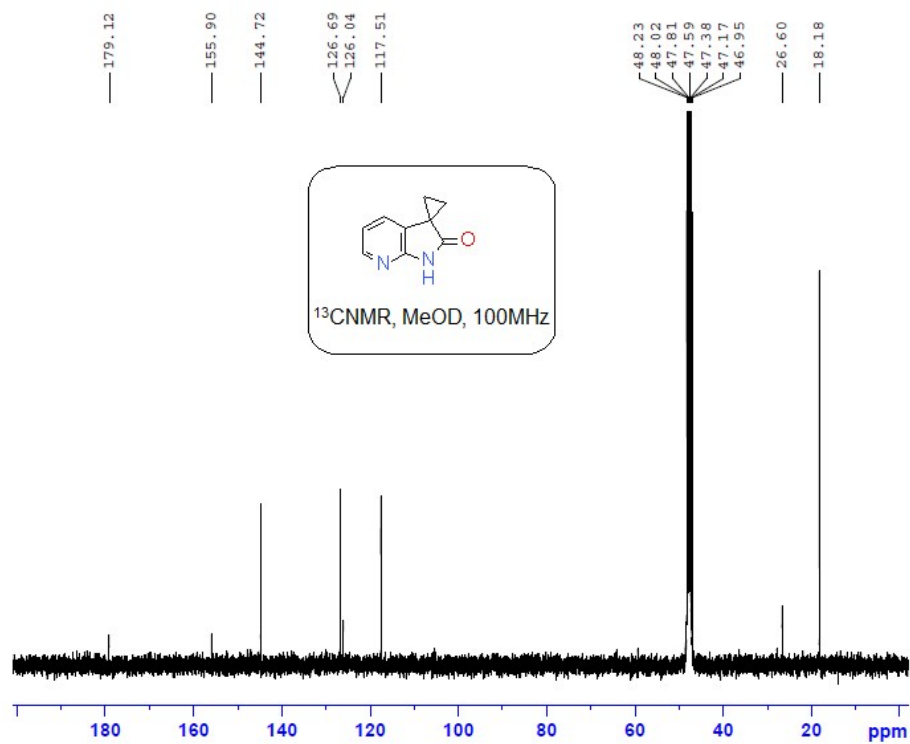

# <sup>1</sup>H NMR of Compound 9p

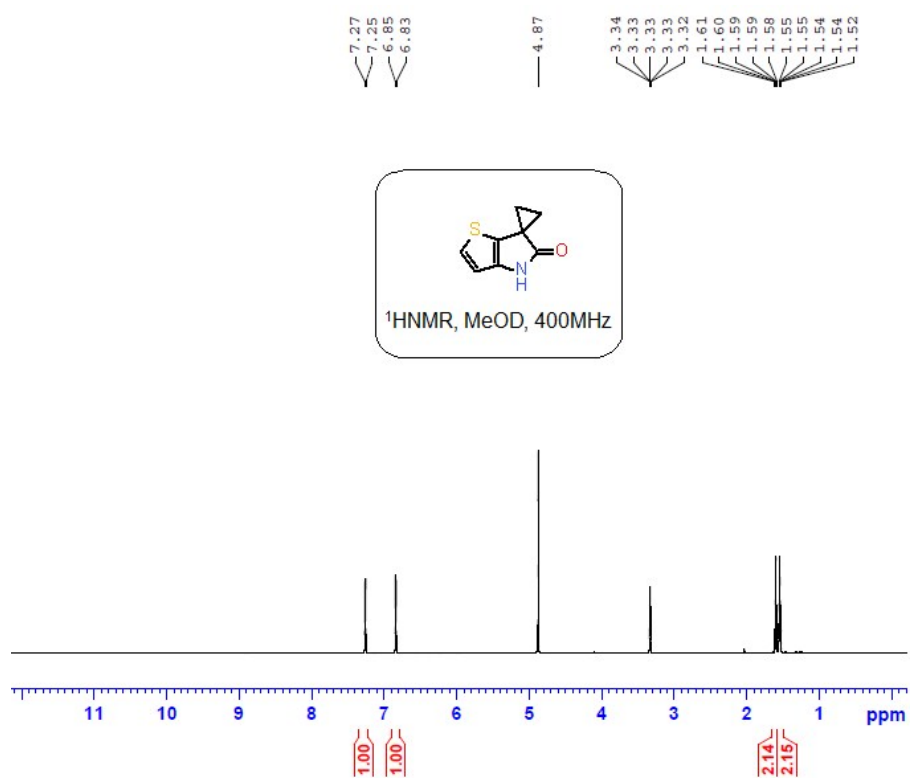

## <sup>13</sup>C NMR of Compound 9p

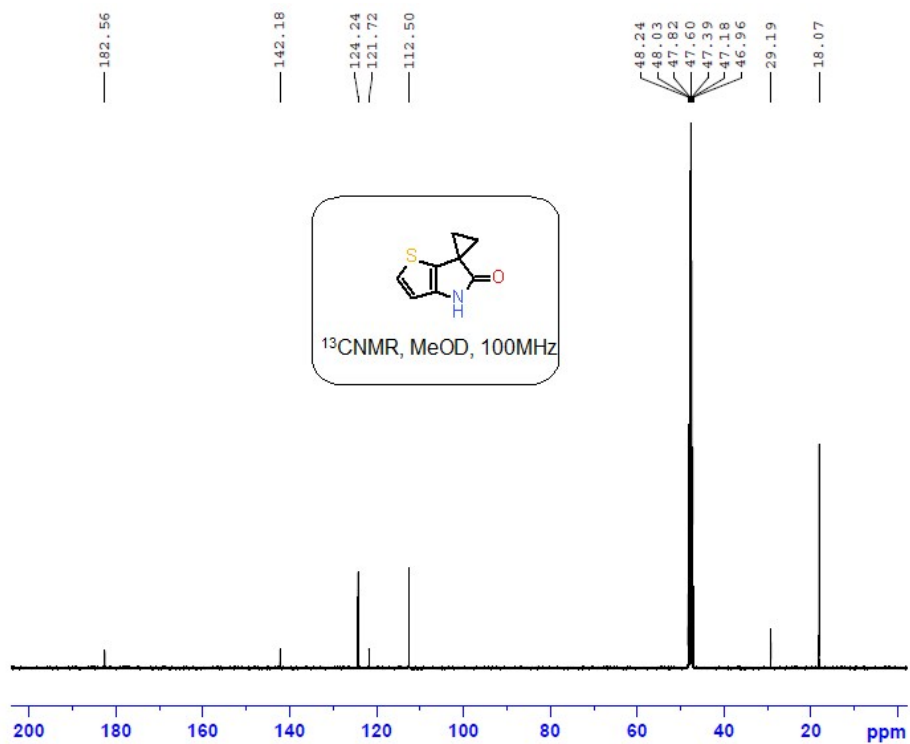

# <sup>1</sup>H NMR of Compound 9q

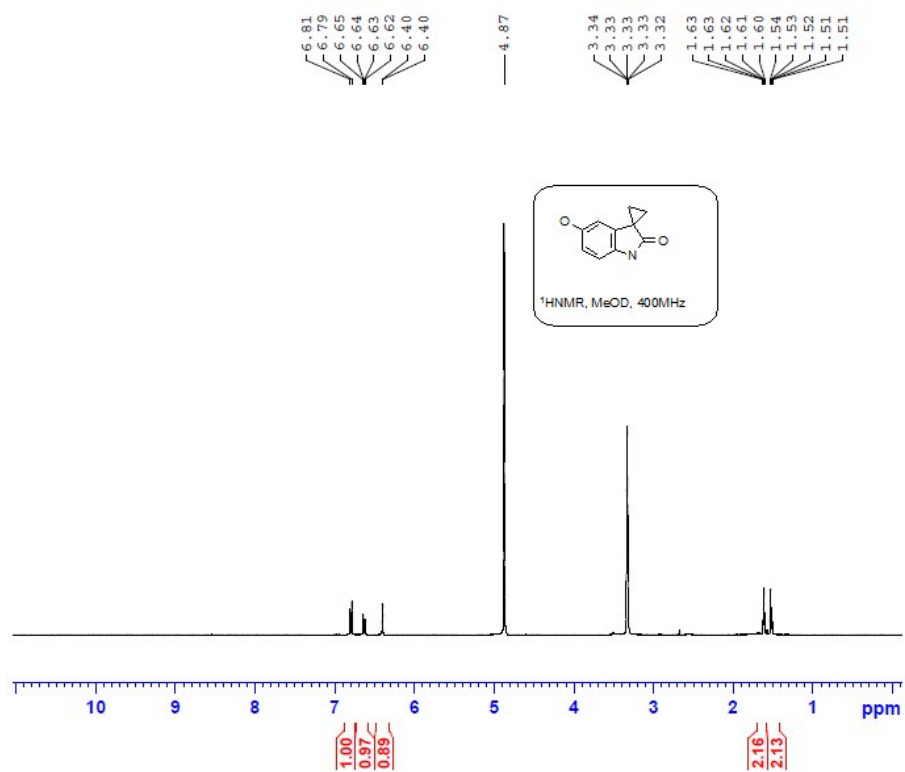

## <sup>13</sup>C NMR of Compound 9q

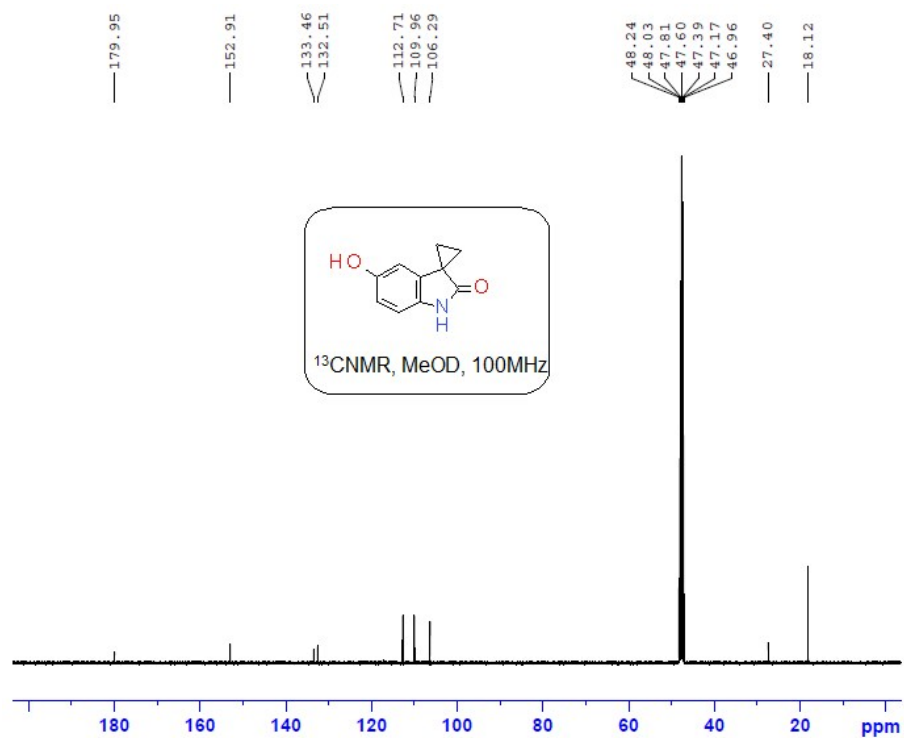

# <sup>1</sup>H NMR of Compound 9r

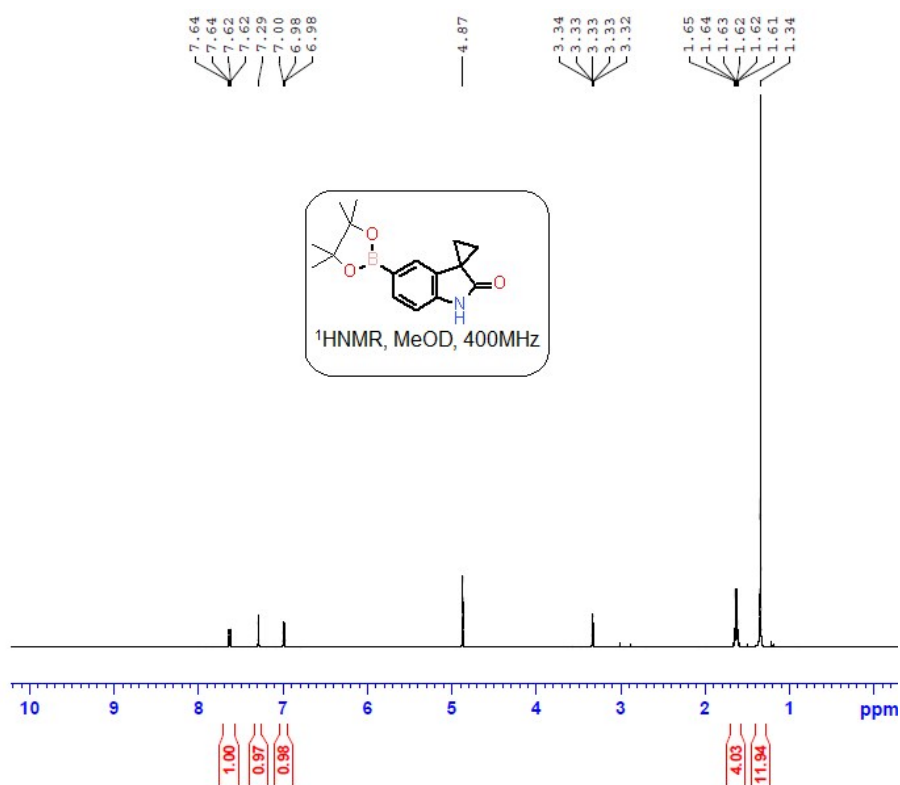

# <sup>13</sup>C NMR of Compound 9r

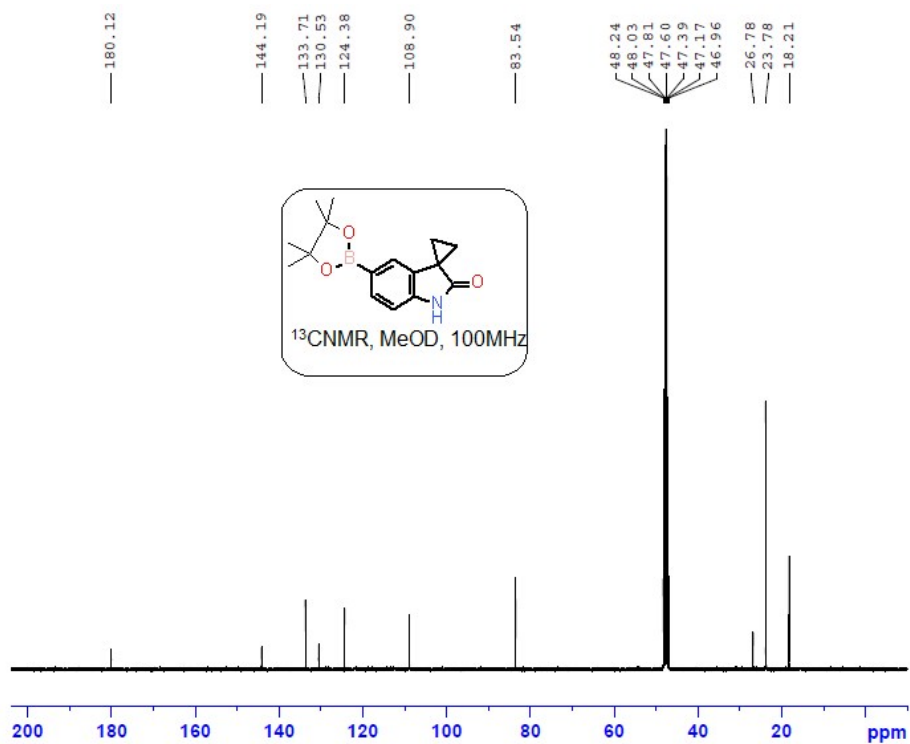

# <sup>1</sup>H NMR of Compound 9s

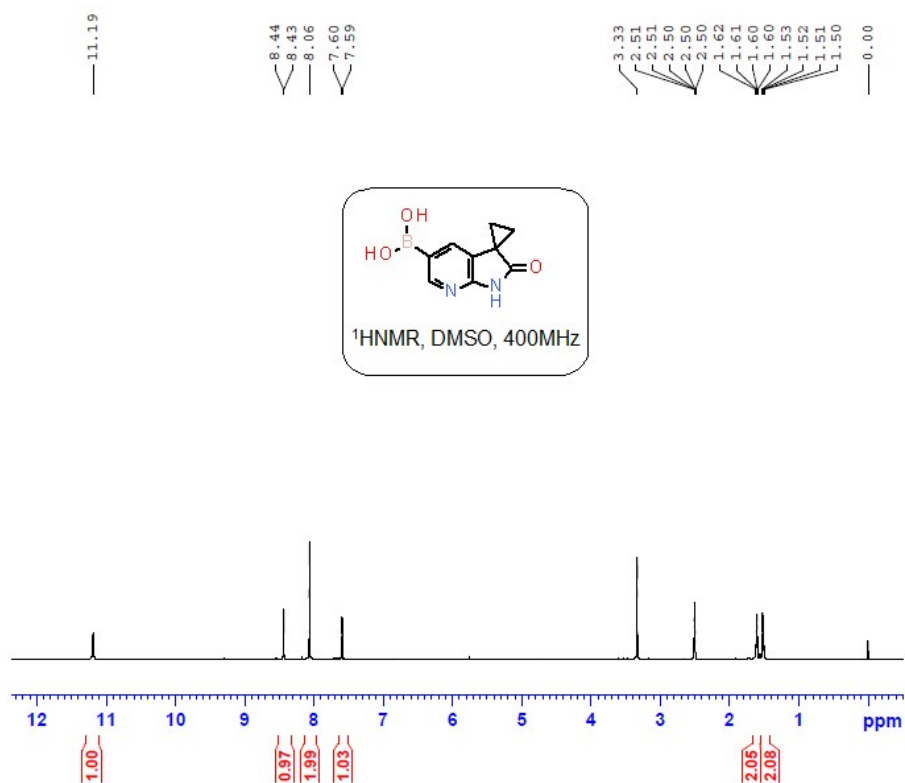

# <sup>13</sup>C NMR of Compound 9s

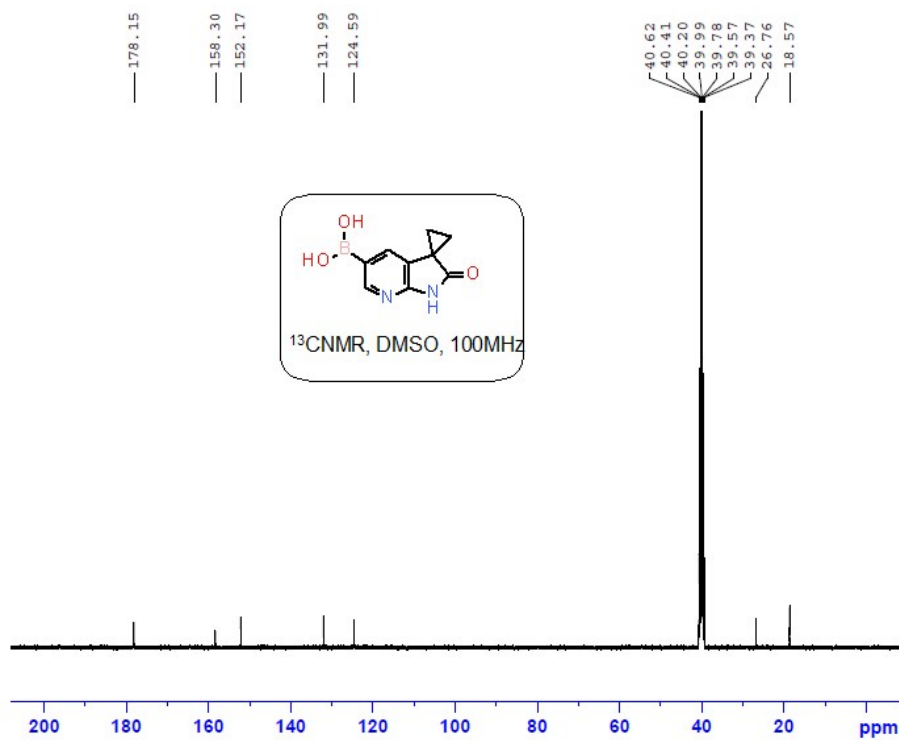

# <sup>1</sup>H NMR of Compound 1b

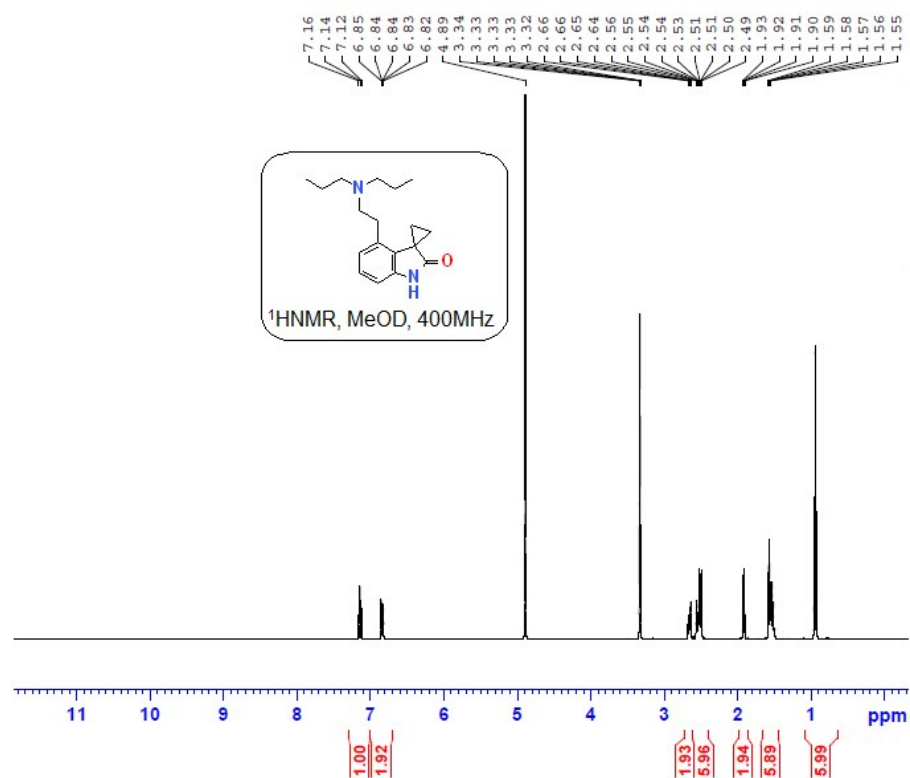

# <sup>13</sup>C NMR of Compound 1b

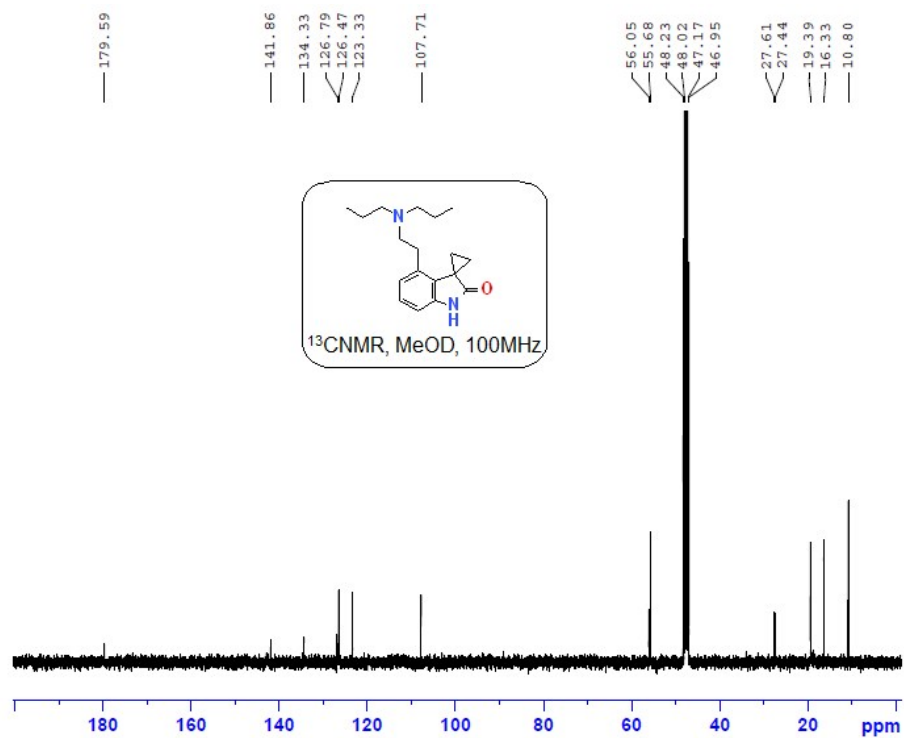

# <sup>1</sup>H NMR of Compound 2b

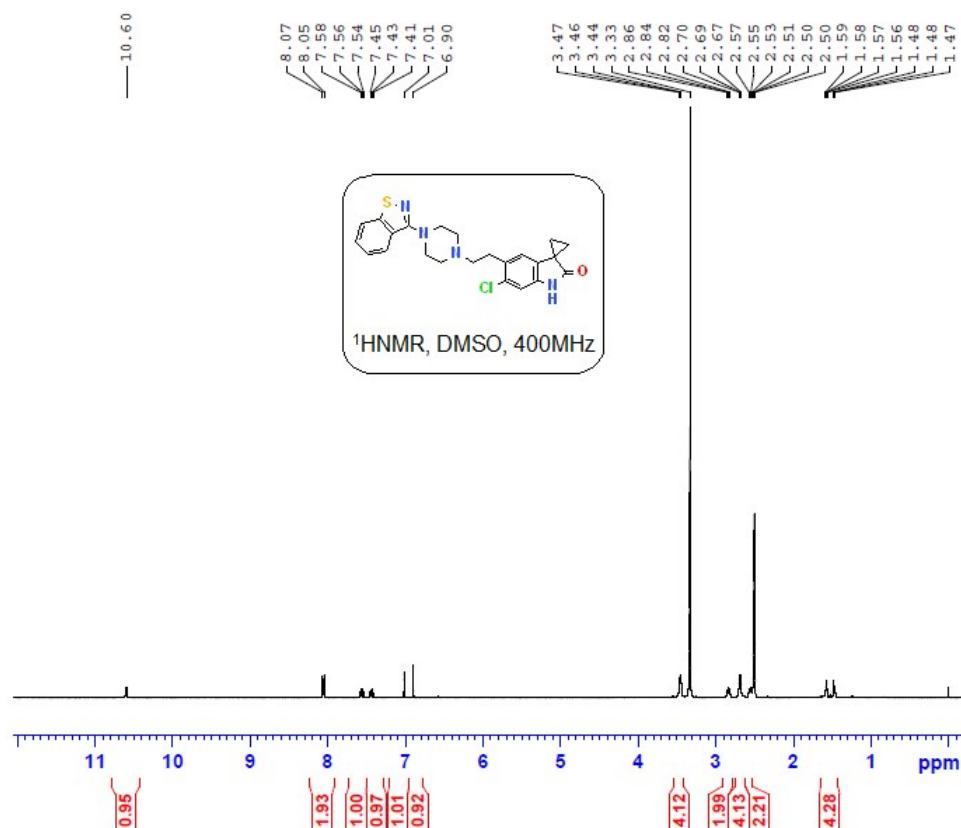

# <sup>13</sup>C NMR of Compound 2b

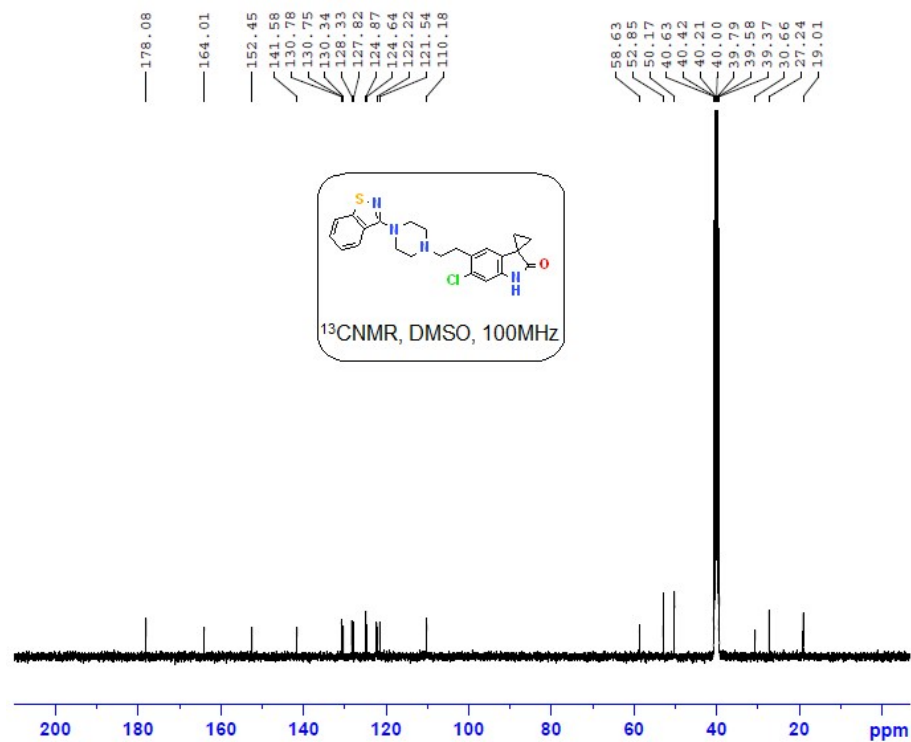

# <sup>1</sup>H NMR of Compound 3b

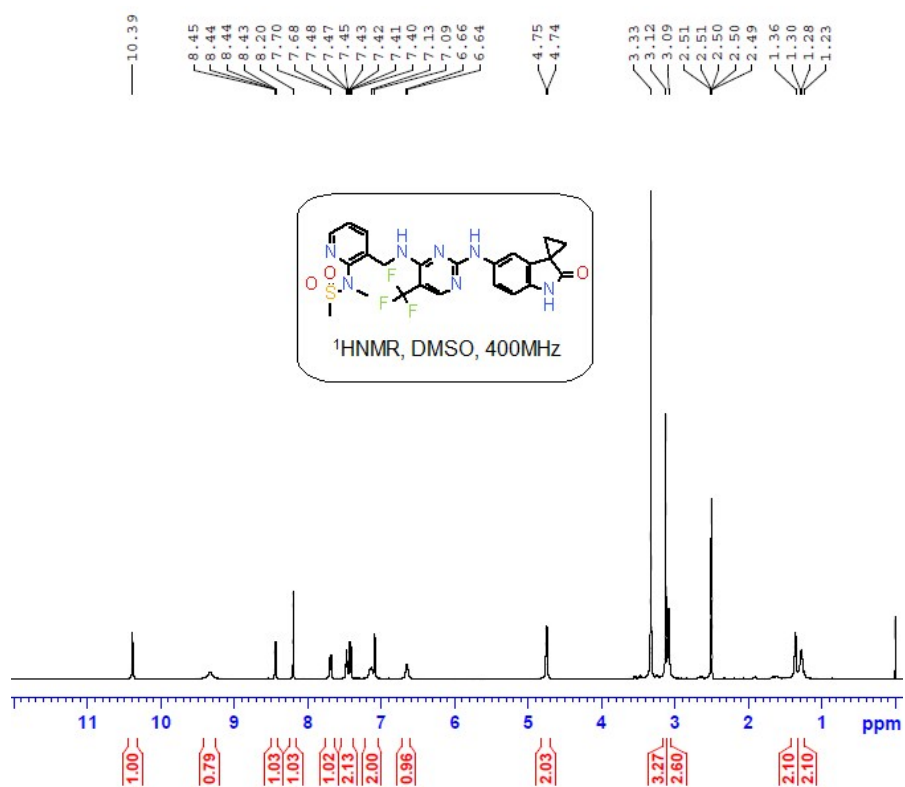

# <sup>13</sup>C NMR of Compound 3b

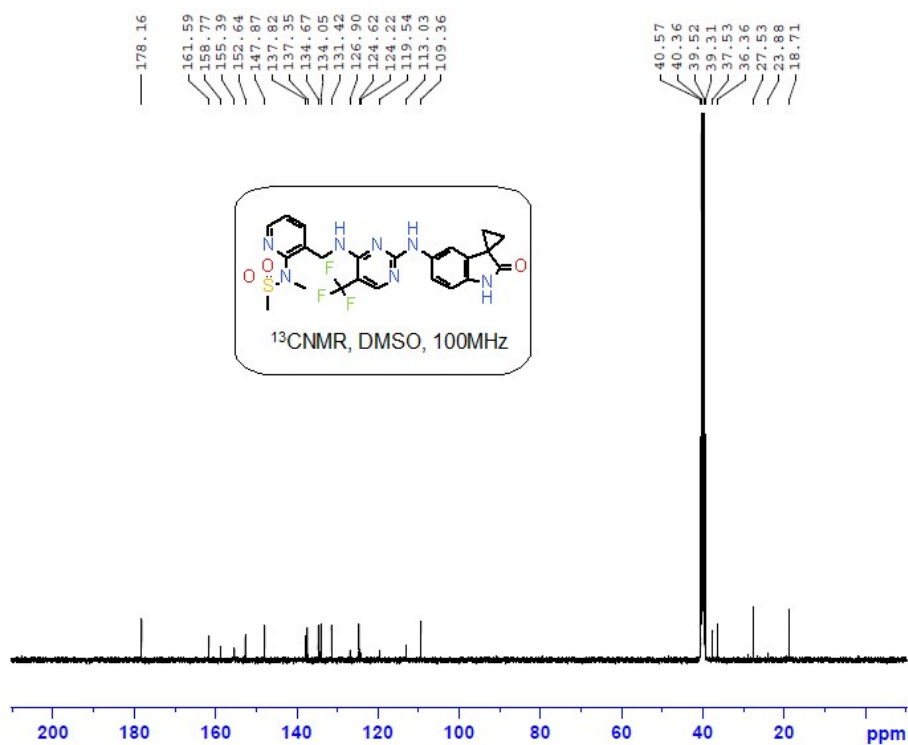



<sup>1</sup>H NMR of Compound 12a

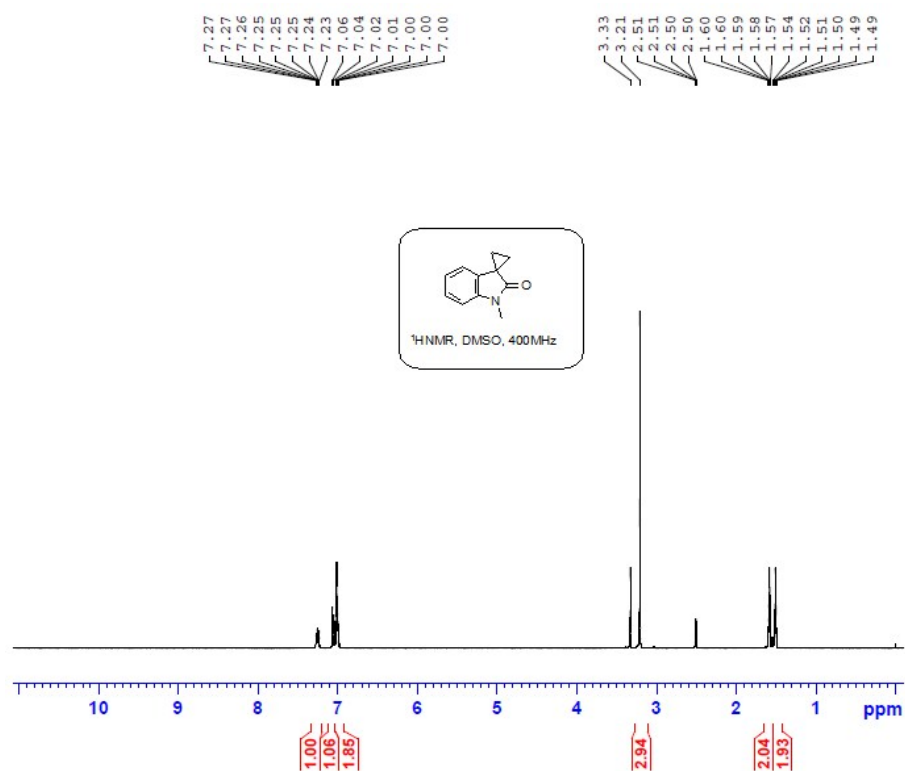

<sup>13</sup>C NMR of Compound 12a

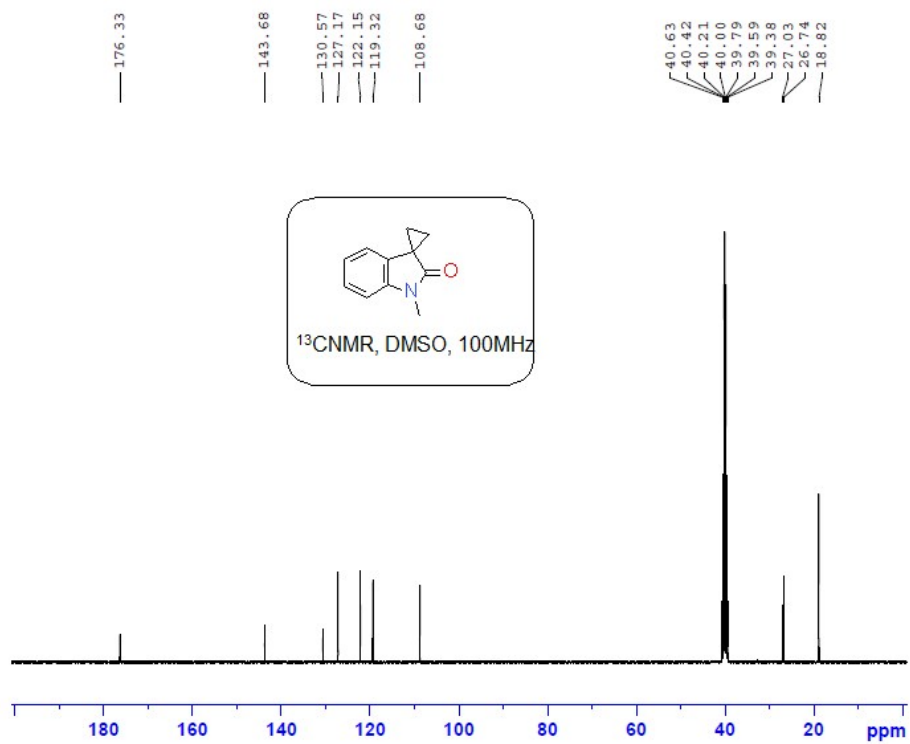

# <sup>1</sup>H NMR of Compound 12b

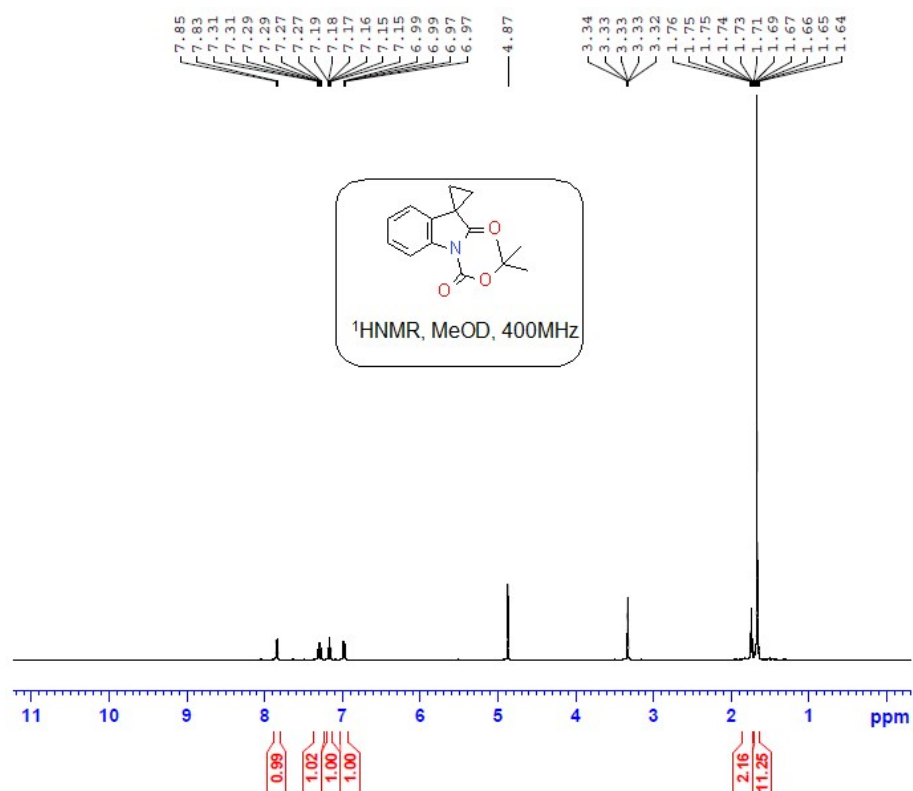

# <sup>13</sup>C NMR of Compound 12b

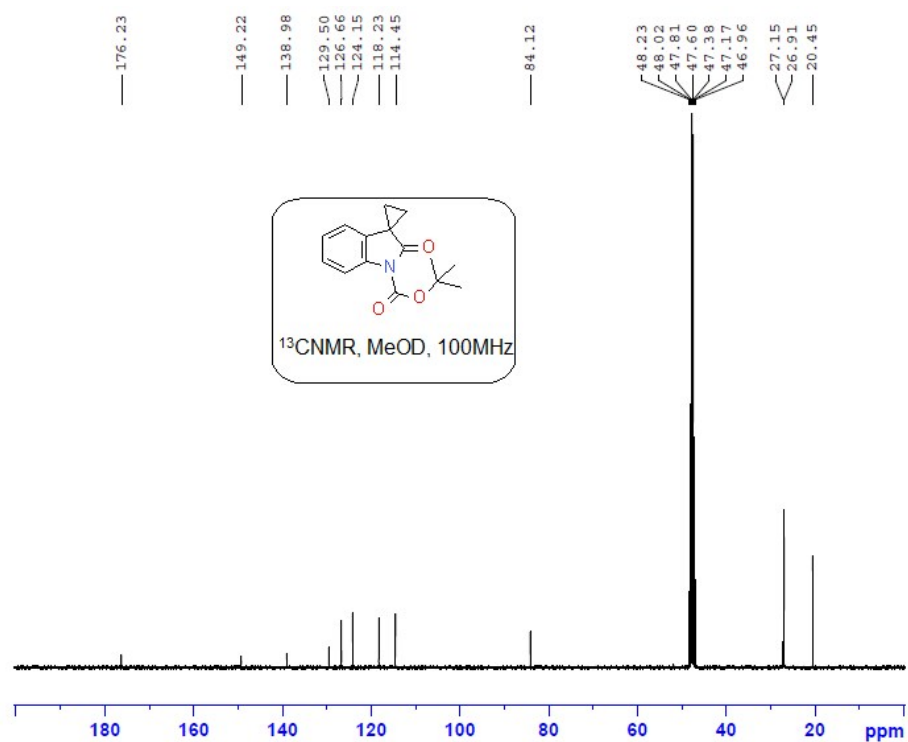

# <sup>1</sup>H NMR of Compound 12c

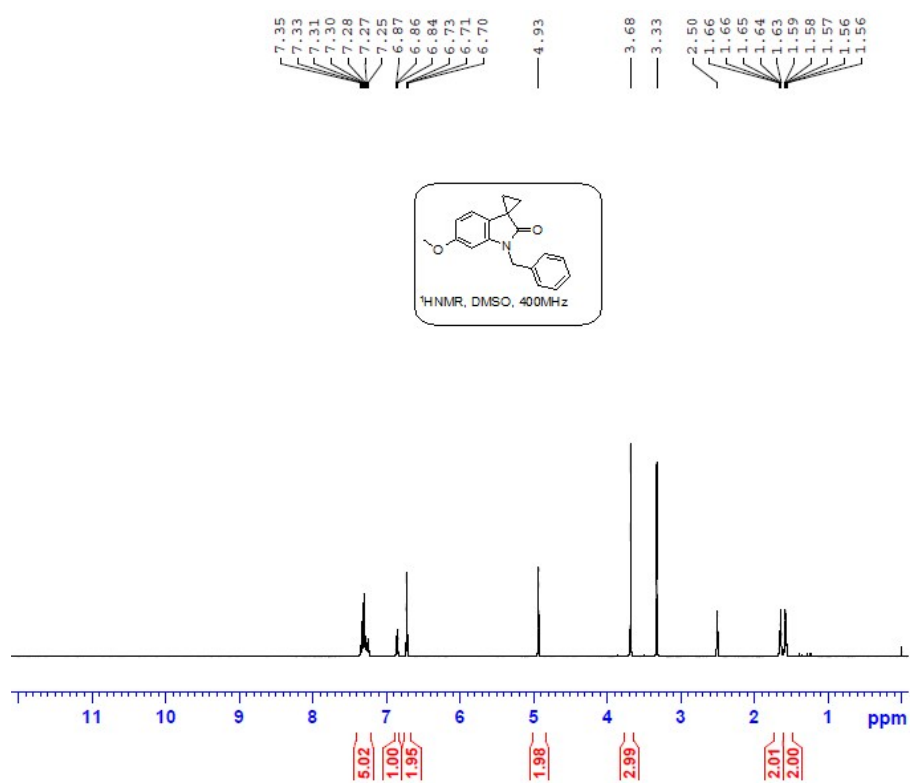

# <sup>13</sup>C NMR of Compound 12c

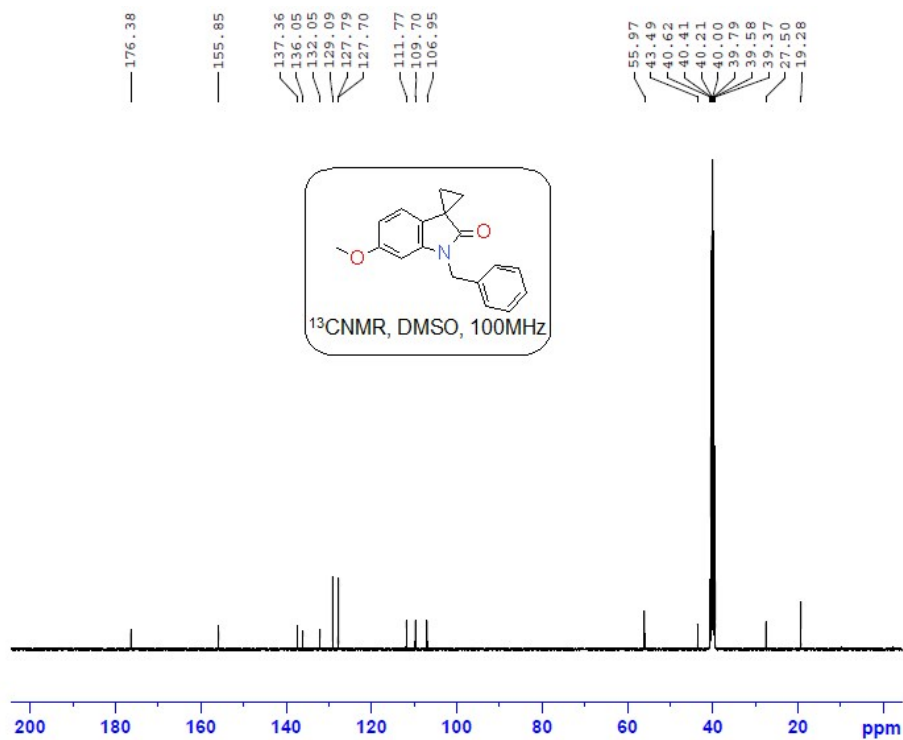

<sup>1</sup>H NMR of Compound 12d

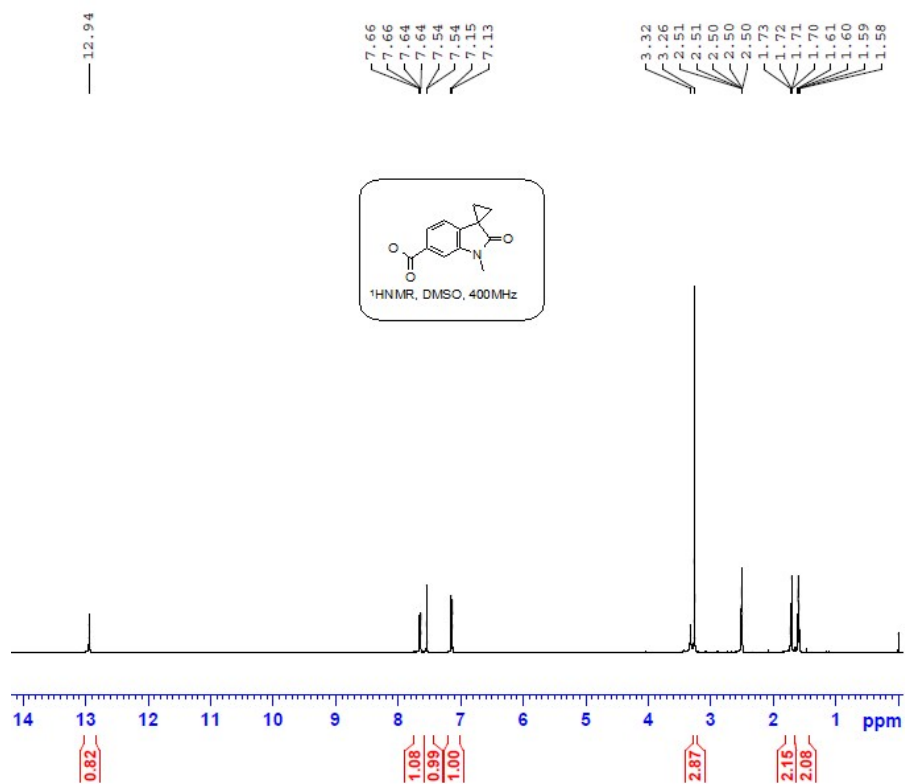

<sup>13</sup>C NMR of Compound 12d

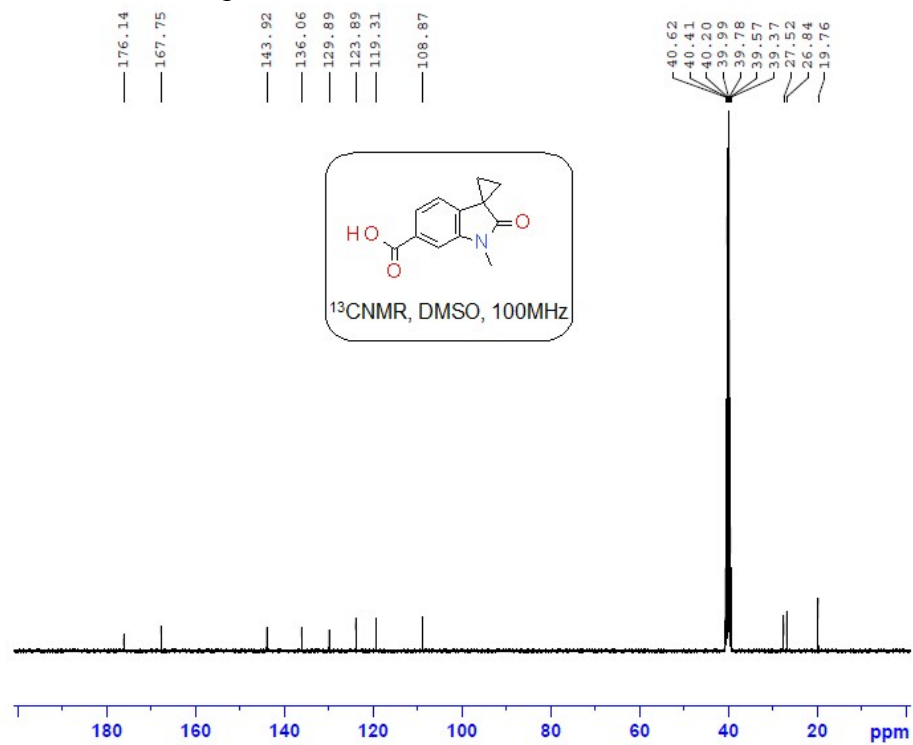

<sup>1</sup>H NMR of Compound 12e

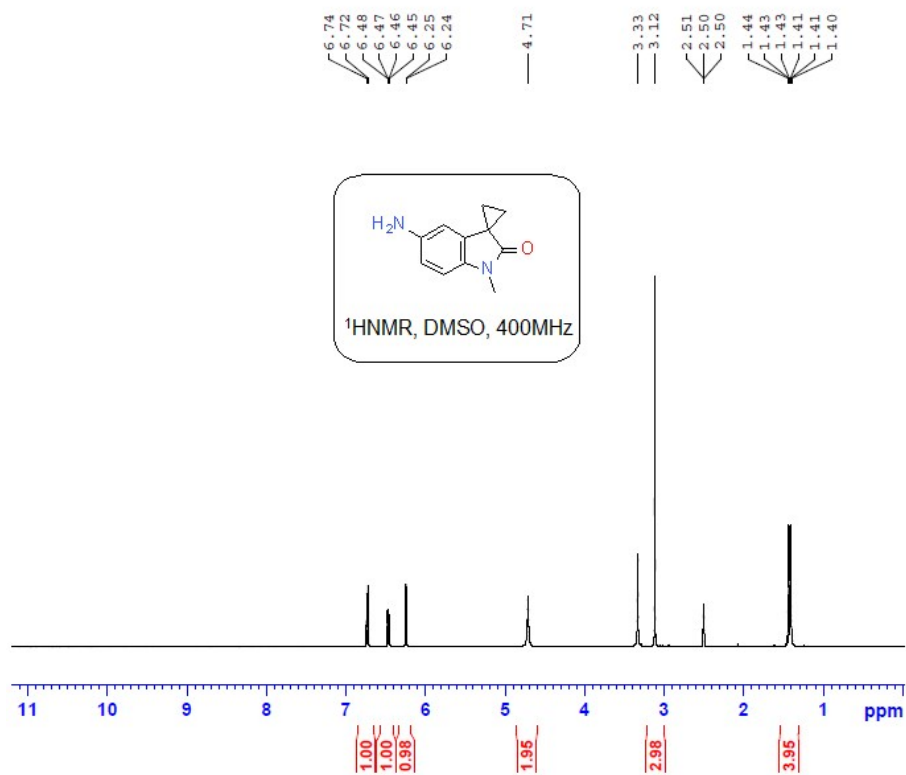

<sup>13</sup>C NMR of Compound 12e

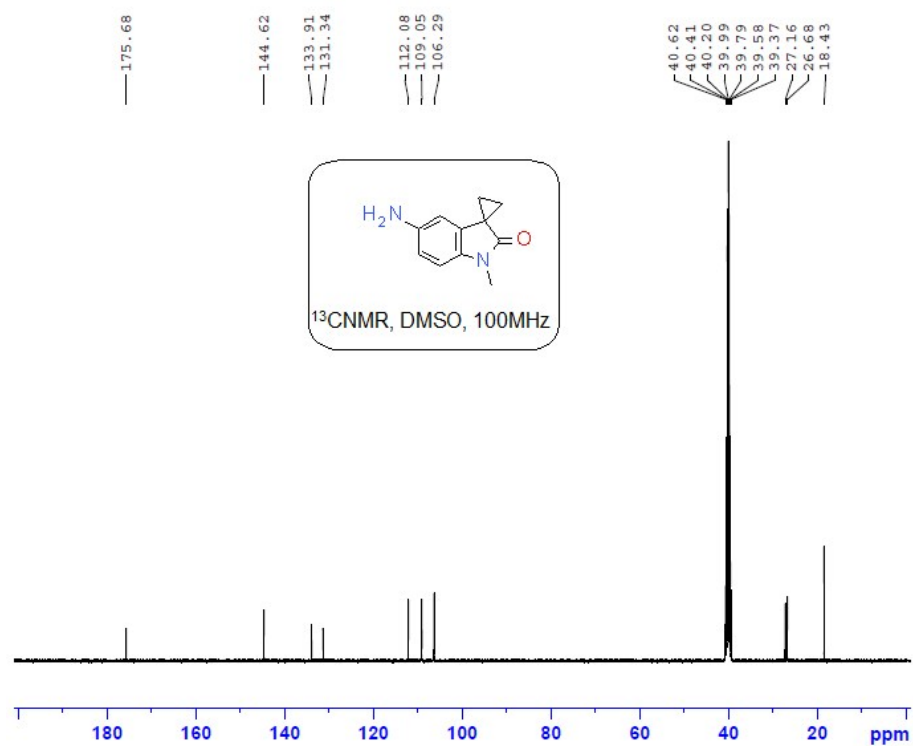

<sup>1</sup>H NMR of Compound 13a

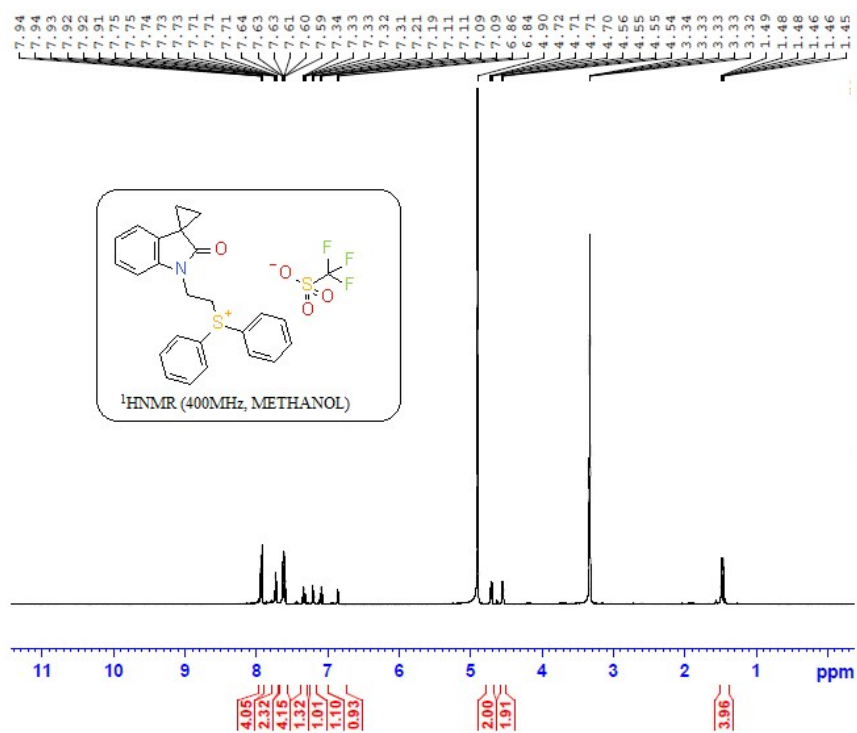

<sup>13</sup>C NMR of Compound 13a

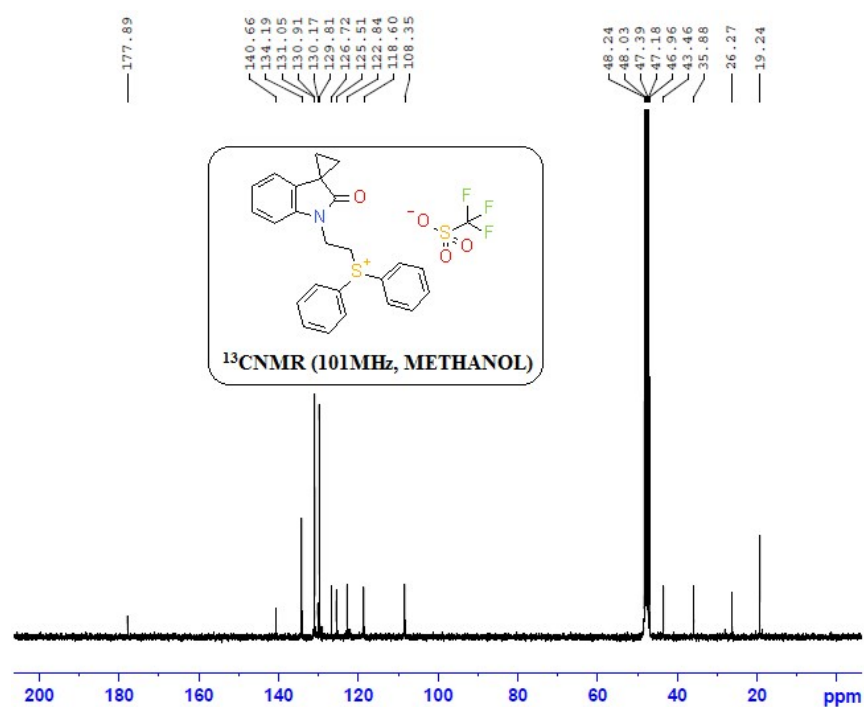

Supplement: c6ra24985j1.pdf [file c6ra24985j1.pdf]
